# Supplementary material for: Sustainability of Diets in Mexico: Diet Quality, Environmental Footprint, Diet Cost, and Sociodemographic Factors
Source: PubMed Central journal article supplement (PMC9185856; doi:10.3389/fnut.2022.855793), 2022-05-27
Supplement: Data_Sheet_1.pdf [file Data_Sheet_1.pdf]

## Supplementary Material

Title: Sustainability of diets in Mexico: diet quality, environmental footprint, diet cost, and sociodemographic factors

Authors:

**Authors names:** Katherine Curi-Quinto<sup>1</sup>, Mishel Unar-Munguía<sup>1</sup>, Sonia Rodríguez-Ramírez<sup>1</sup>, Juan A. Rivera<sup>2</sup>, Jessica Fanzo<sup>3</sup>, Walter Willett<sup>4</sup>, Elin Rööös<sup>5</sup>

<sup>1</sup>Center for Research on Health and Nutrition, National Institute of Public Health, Cuernavaca, Morelos, Mexico. [kcuri@iin.sld.pe](mailto:kcuri@iin.sld.pe)

<sup>2</sup>National Institute of Public Health, Cuernavaca, Morelos, México.

<sup>3</sup>Nitze School of Advanced International Studies, Bloomberg School of Public Health, Johns Hopkins University, Baltimore, MD USA

<sup>4</sup>Department of Nutrition, Harvard School of Public Health, Boston, MA, USA.

<sup>5</sup>Department of Energy and Technology, Swedish University of Agricultural Sciences, Uppsala, Sweden.

## Table of Contents

|                                                                                                                                                                                                        |    |
|--------------------------------------------------------------------------------------------------------------------------------------------------------------------------------------------------------|----|
| <b>Supplementary Figure 1.</b> Flow chart of the study sample.....                                                                                                                                     | 4  |
| <b>Supplementary Figure 2.</b> Overview of the diet sustainability assessment. ....                                                                                                                    | 5  |
| <b>Supplementary Table 1.</b> Dietary components and scoring criteria used for construction of HEI-2015<br>.....                                                                                       | 6  |
| <b>Supplementary Figure 3.</b> Results of sensitivity analysis using the definition of more sustainable diets<br>but excluding the diet cost. ....                                                     | 8  |
| <b>Supplementary methods: Environmental footprint indicators</b> .....                                                                                                                                 | 9  |
| <b>Supplementary Figure 4.</b> Methodological scheme for estimation of environmental footprint<br>indicators of plant-based food using dietary data from SFFQ .....                                    | 11 |
| <b>Supplementary Figure 5</b> Methodological scheme for estimation of environmental footprint indicators<br>of animal-based food using dietary data from SFFQ.....                                     | 12 |
| <b>Supplementary Table 2.</b> Data used to calculate the environmental footprint indicators of plant-based<br>food in SFFQ-ENSANUT 2012.....                                                           | 13 |
| <b>Supplementary Table 2 (Continued).</b> Data used to calculate the environmental footprint indicators<br>of plant-based food in SFFQ-ENSANUT 2012.....                                               | 14 |
| <b>Supplementary Table 2 (Continued).</b> Data used to calculate the environmental footprint indicators<br>of plant-based food in SFFQ-ENSANUT 2012.....                                               | 15 |
| <b>Supplementary Table 2 (Continued).</b> Data used to calculate the environmental footprint indicators<br>of plant-based food in SFFQ-ENSANUT 2012.....                                               | 16 |
| <b>Supplementary Table 2 (Continued).</b> Data used to calculate the environmental footprint indicators<br>of animal-based food in SFFQ-ENSANUT 2012.....                                              | 17 |
| <b>Supplementary Table 3.</b> Data used to calculate the environmental footprint indicators of processed<br>animal and plant-based food in SFFQ-ENSANUT 2012.....                                      | 18 |
| <b>Supplementary Table 3 (Continued).</b> Data used to calculate the environmental footprint indicators<br>of processed animal and plant-food in SFFQ-ENSANUT 2012.....                                | 19 |
| <b>Supplementary Table 4.</b> Feed ration composition (%) for meat and dairy by production system,<br>based on GLEAM-i data for Mexico .....                                                           | 20 |
| <b>Supplementary Table 5.</b> Average feed ratio composition (%) for meat and dairy by production<br>system, based on GLEAM-i data for Mexico .....                                                    | 22 |
| <b>Supplementary Table 6.</b> Feed ratio composition (%) for chicken and pig by production system, based<br>on GLEAM-i data for Mexico .....                                                           | 24 |
| <b>Supplementary Table 7.</b> Parameters for cattle production used in estimation of environmental<br>footprint indicators by orientation and production system, based on GLEAM-i data for Mexico..... | 25 |
| <b>Supplementary Table 8.</b> Parameters for chicken and pig production used in estimation of<br>environmental footprint indicators by production system, based on GLEAM-i data for Mexico.....        | 26 |
| <b>Supplementary Table 9.</b> Average land use and average potential species loss per kg dry matter (DM)<br>of each animal feed ration component .....                                                 | 27 |

|                                                                                                                                                         |    |
|---------------------------------------------------------------------------------------------------------------------------------------------------------|----|
| <b>Supplementary Table 10.</b> Land use, biodiversity loss, and parameters used to estimate the carbon footprint of animal-based food in SFFQ.....      | 29 |
| <b>Supplementary Table 11.</b> Spearman correlation coefficients between diet quality (HEI-2015) and different environmental footprint indicators ..... | 31 |

**Supplementary Figure 1.** Flow chart of the study sample.

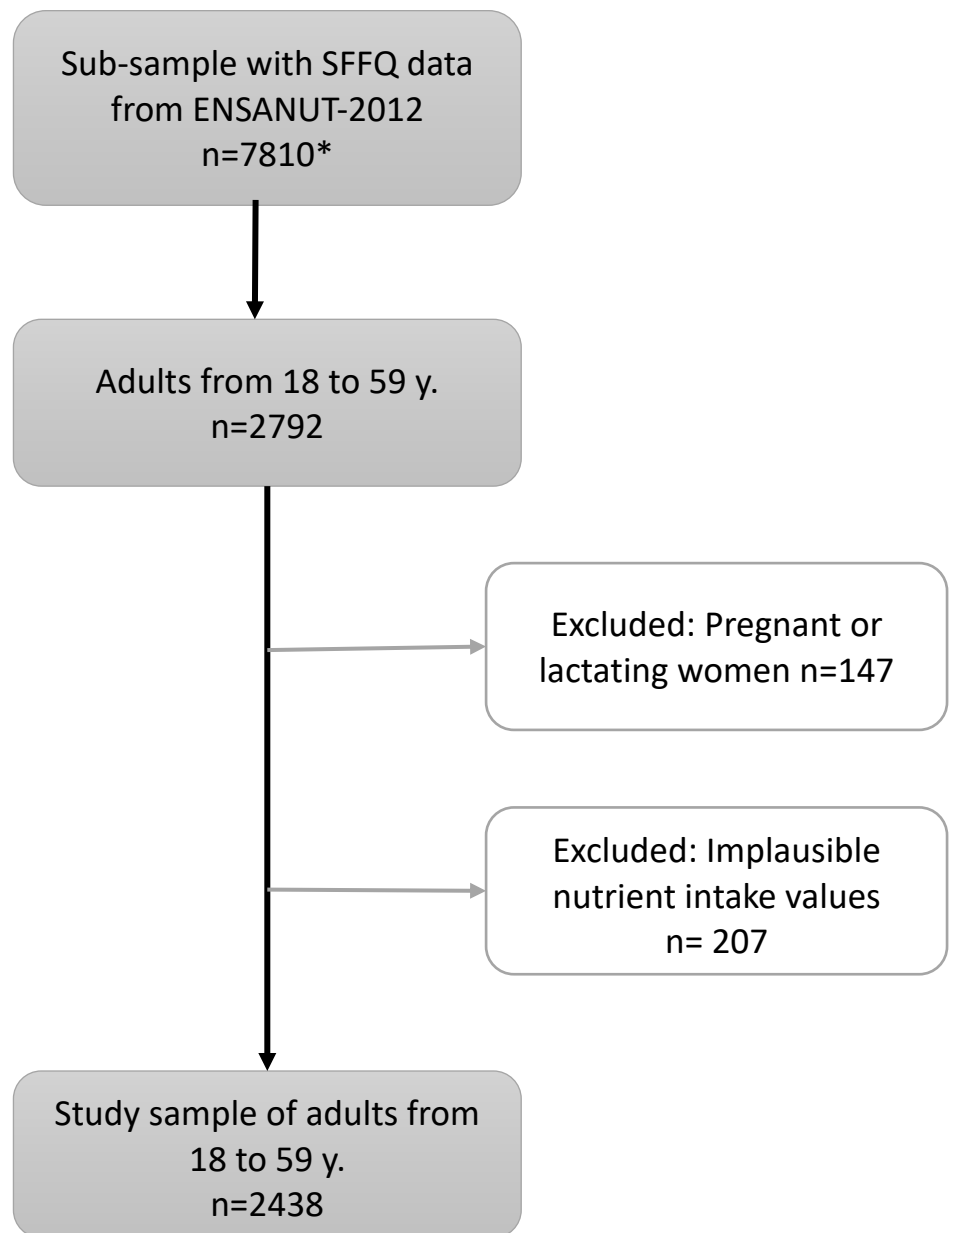

\*Includes population from different age groups (from pre-school children to older adults).

*Based on Ramirez et al. (2016). Methodology for estimating dietary data from the semi-quantitative food frequency questionnaire (SFFQ) of the Mexican National Health and Nutrition Survey 2012 (ENSANUT-2012).*

**Supplementary Figure 2.** Overview of the diet sustainability assessment.

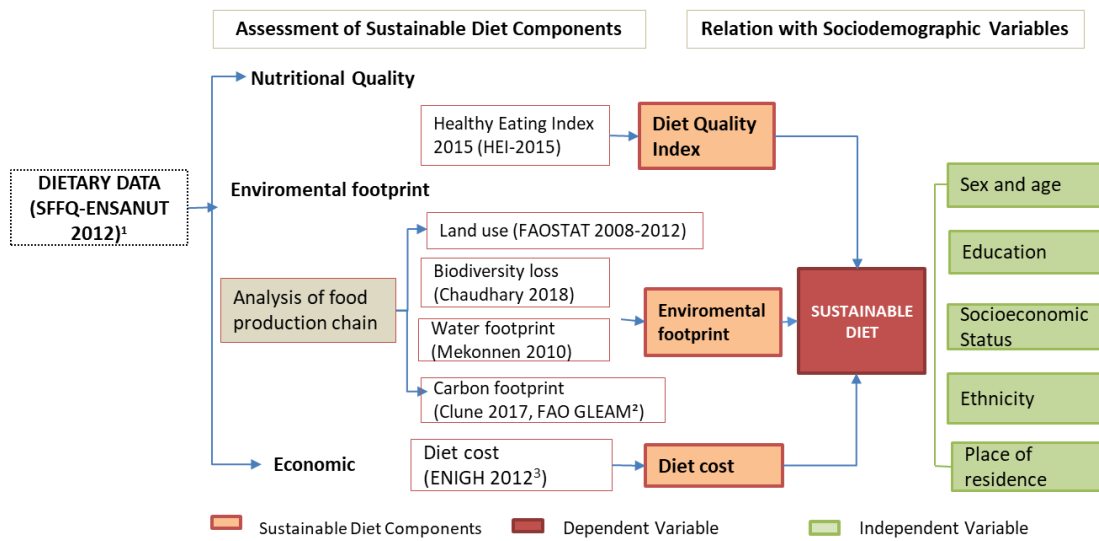

<sup>1</sup>National Health and Nutrition Survey. <sup>2</sup>Global Livestock Environmental Assessment Model <sup>3</sup>National Income and Expenditures Survey

**Supplementary Table 1.** Dietary components and scoring criteria used for construction of HEI-2015

| Dietary component                      | Maximum | Standard for maximum           | Standard for minimum                |
|----------------------------------------|---------|--------------------------------|-------------------------------------|
| <b>Adequacy:</b>                       |         |                                |                                     |
| Total Fruits <sup>2</sup>              | 5       | ≥0.8 cup equiv. per 1,000 kcal | No fruit                            |
| Whole Fruits <sup>3</sup>              | 5       | ≥0.4 cup equiv. per 1,000 kcal | No whole fruit                      |
| Total Vegetables <sup>4*</sup>         | 5       | ≥1.1 cup equiv. per 1,000 kcal | No vegetables                       |
| Greens and Beans <sup>5*</sup>         | 5       | ≥0.2 cup equiv. per 1,000 kcal | No dark green vegetables or legumes |
| Whole Grains                           | 10      | ≥1.5 oz equiv. per 1,000 kcal  | No whole grains                     |
| Dairy <sup>6</sup>                     | 10      | ≥1.3 cup equiv. per 1,000 kcal | No dairy                            |
| Total Protein Foods <sup>7*</sup>      | 5       | ≥2.5 oz equiv. per 1,000 kcal  | No protein foods                    |
| Seafood & Plant Proteins <sup>8*</sup> | 5       | ≥0.8 oz equiv. per 1,000 kcal  | No seafood or plant proteins        |
| Fatty Acids <sup>9</sup>               | 10      | (PUFAs + MUFAs)/SFAs ≥2.5      | (PUFAs + MUFAs)/SFAs ≤1.2           |
| <b>Moderation:</b>                     |         |                                |                                     |
| Refined Grains                         | 10      | ≤1.8 oz equiv. per 1,000 kcal  | ≥4.3 oz equiv. per 1,000 kcal       |
| Sodium                                 | 10      | ≤1.1 gram per 1,000 kcal       | ≥2.0 grams per 1,000 kcal           |
| Added Sugars                           | 10      | ≤6.5% of energy                | ≥26% of energy                      |
| Saturated Fats                         | 10      | ≤8% of energy                  | ≥16% of energy                      |

\*The units for each dietary component are called unit equivalents, for example the unit equivalent for total fruits is the cup equivalent per 1,000 kcal, for whole grains it is the ounce equivalent per 1,000 kcal, etc.

<sup>1</sup>Intakes between the minimum and maximum standards are scored proportionately.

<sup>2</sup>Includes 100% fruit juice.

<sup>3</sup>Includes all forms except juice.

<sup>4\*</sup>Originally included legumes (beans and peas). In this study we included only vegetables and fresh green peas.

<sup>5\*</sup>Originally included legumes (beans and peas). In this study we included only legumes (beans, lentils, chickpeas, etc.)

<sup>6</sup>Includes all milk products, such as fluid milk, yogurt, and cheese, and fortified soy beverages.

<sup>7\*</sup>Originally included legumes (beans and peas). In this study we included only protein from animal sources.

<sup>8\*</sup>Originally included seafood, nuts, seeds, soy products (other than beverages), and legumes (beans and peas). In this study we excluded soy products and legumes.

<sup>9</sup>Ratio of poly- and monounsaturated fatty acids (PUFAs and MUFAs) to saturated fatty acids (SFAs).



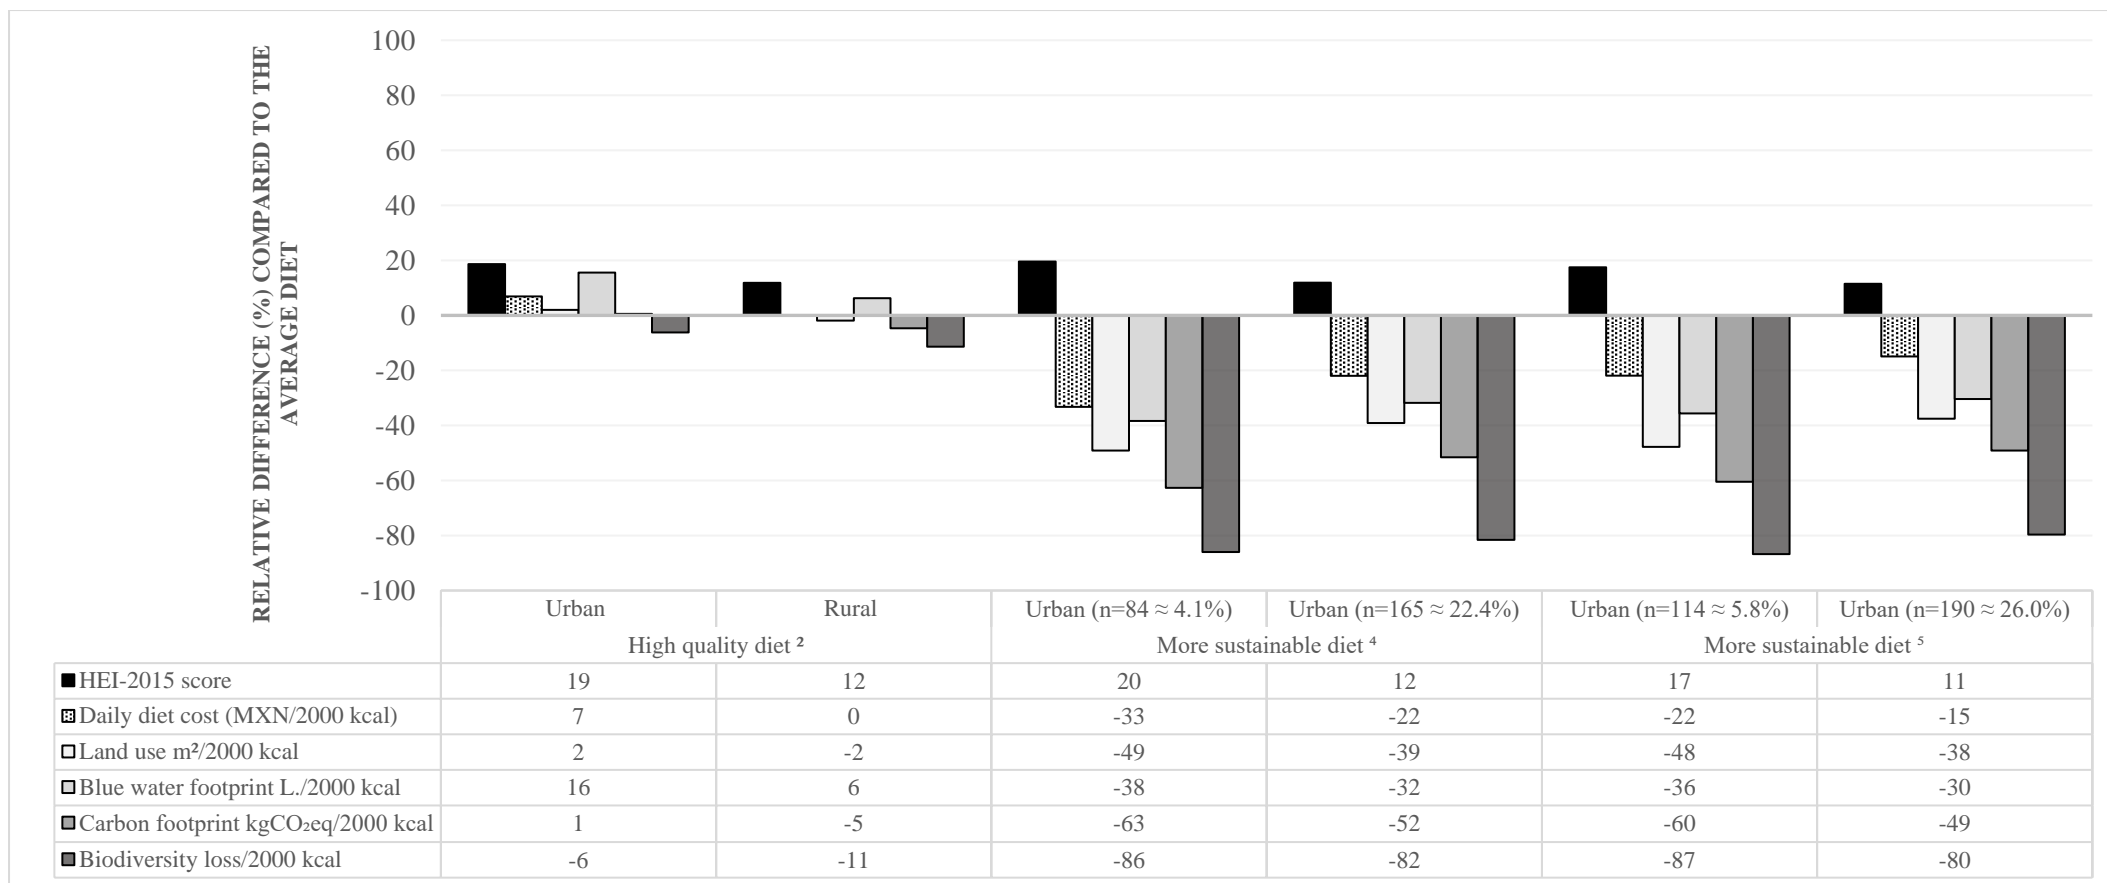

**Supplementary Figure 3.** Results of sensitivity analysis using the definition of more sustainable diets but excluding the diet cost. Relative difference (%) compared to average diet of HEI-2015 score, daily diet cost, and environmental footprint indicators (land use, blue water footprint, carbon footprint, and biodiversity loss), among the high-quality diets, and two definitions of more sustainable diets compared to the habitual diet by area of residence. Diets with HEI-2015 score above the median of the HEI-2015 of their respective reference group. <sup>5</sup>Diets that combine the criteria for high-quality, low-cost and low-environmental footprint diets. <sup>6</sup>Diets that combine the criteria for high-quality and low-environmental footprint diets.



## Supplementary methods: Environmental footprint indicators

To assess the environmental sustainability of the Mexican diets, we selected a set of commonly used environmental indicators, or environmental footprints (1). Below we justify the choice of indicators and briefly describe their limitations.

For estimating the contribution to climate change from the different diets, we used the carbon footprint (CFP) of foods, defined as estimated total amount of GHG emitted from a life cycle perspective from the product under study (2). CFP is an environmental indicator that shows emissions of greenhouse gases (GHG) including carbon dioxide (CO<sub>2</sub>), methane (CH<sub>4</sub>), and nitrous oxide (N<sub>2</sub>O) to the atmosphere. There are different metrics available to aggregate the different GHGs into one metric (3), here we used the commonly applied Global Warming Potential (GWP) (4). However, GWP has several limitations, e.g., it requires an arbitrary choice of time horizon, which heavily affects the results and underrepresents longer-term climate impacts. Therefore several alternative metrics have been suggested (3) and alternative approaches for aggregating emissions from agriculture to better represent how emissions affect temperature change are being discussed (5). However, all metrics have limitations and their suitability ultimately depends on the application (3,6). In this study, we used GWP over a 100-year perspective (GWP<sub>100</sub>) for the following reasons: 1) It is the most commonly used carbon footprint metric to date, thus enabling comparisons with other studies, 2) despite its limitations, it provides a valuable measure of the climate impact averaged over the coming hundred years, and 3) it is the metric for which data are available. The GLEAM-I estimates for animal-source food in Mexico use GWP factors from the AR5 IPCC report (7) (methane: 34, nitrous oxide: 298), while most of the studies estimating global average CFPs in the review by Clune et al. (8) probably used factors from the previous AR4 IPCC report (9) (methane: 25, nitrous oxide: 298) for plant-based foods. Thus, there is a difference in the methane factor used for animal-source foods and plant-based foods. However, rice is the only plant-based food associated with substantial methane emissions. Rice is not a staple in the Mexican diet to the same extent as maize and wheat (average daily intake of rice is 8.8 g per person, compared with 22.7 g tortilla and 23.1 g white bread). Using the lower methane factor for rice involved an underestimation of the CFP of the average Mexican diet of less than 0.5%, indicating that this inconsistency had no major impact on the results.

The blue water footprint (BWFP) as defined by Hoekstra et al. (2011)(10), was used to estimate the amount of water needed to produce the Mexican diets. BWFP is defined as “*Volume of surface and groundwater consumed as a result of the production of a product. Consumption refers to the volume of freshwater used and then evaporated or incorporated into a product. It also includes water abstracted from surface or groundwater in a catchment and returned to another catchment or the sea. It is the amount of water abstracted from groundwater or surface water that does not return to the catchment from which it was withdrawn*”. To assess the impact on water resources associated with consumptive blue water use, the water scarcity in the region where different crops are grown needs to be considered (11). There are several methods to account for water scarcity (12,13). For example, the AWARE method (14) supplies region- and country-specific water scarcity factors that can be multiplied by consumptive blue water use to assess water impacts. However, for this study there was no information on where within a country the commodities were grown. Since water availability can vary considerably within a country, particularly large countries such as Mexico and the US, from which the vast majority of the Mexican diet originates, it was not possible to meaningfully apply water scarcity factors. Country-level factors could have been used, but considering the large uncertainties in country-level factors (especially for large countries such as Mexico and the US) we saw little value in using these.

Additionally, as the country-level AWARE factors for Mexico and the US are very similar, it would not have affected the results in this case. It should be stressed that the indicator for sustainability in relation to water use selected for this study does not capture the impact of water use, but it assesses the volume of blue water used to produce the diets. For a further discussion on benefits and drawbacks of different ways to assess water use, see e.g. (15).

Land use refers here to the total amount of agricultural land required for producing the Mexican diets, expressed in square meters. As agricultural land varies in productive capacity, different land use types should ideally be accounted for, most importantly land only suitable for pasture and land suitable for cropping (16). In this study, however, we used the total aggregated land use in order to simplify the analysis. This overestimates land use for diets high in ruminant products (16). The indicators used for land and water use in this study are both pressure indicators, i.e., they communicate the pressure human activities place on ecosystems rather than the potential impact due to such pressures (1).

The biodiversity loss associated with the use of land for producing the Mexican diets was assessed with the method developed by Chaudhary & Brooks (17), which accounts for regional species loss from land occupied by agriculture (reduction or removal of species that would otherwise exist on that land) by accounting for the relative abundance of those species within the region and the overall global threat level for the affected species. The method accounts for five broad land uses (managed forest, plantations, pasture, cropland, and urban), three land use intensities (minimal, light and intense), and five taxa (plants, mammals, birds, amphibians, and reptiles). There are still several limitations with this method, including poor resolution in land types and land management practices, and there are large gaps in current knowledge on how damaging a particular land use type is to different taxa in different parts of the world. The pathway from land use to biodiversity damage is highly complex, making it challenging to include all aspects in a single indicator (17).

**Supplementary Figure 4.** Methodological scheme for estimation of environmental footprint indicators of plant-based food using dietary data from SFFQ

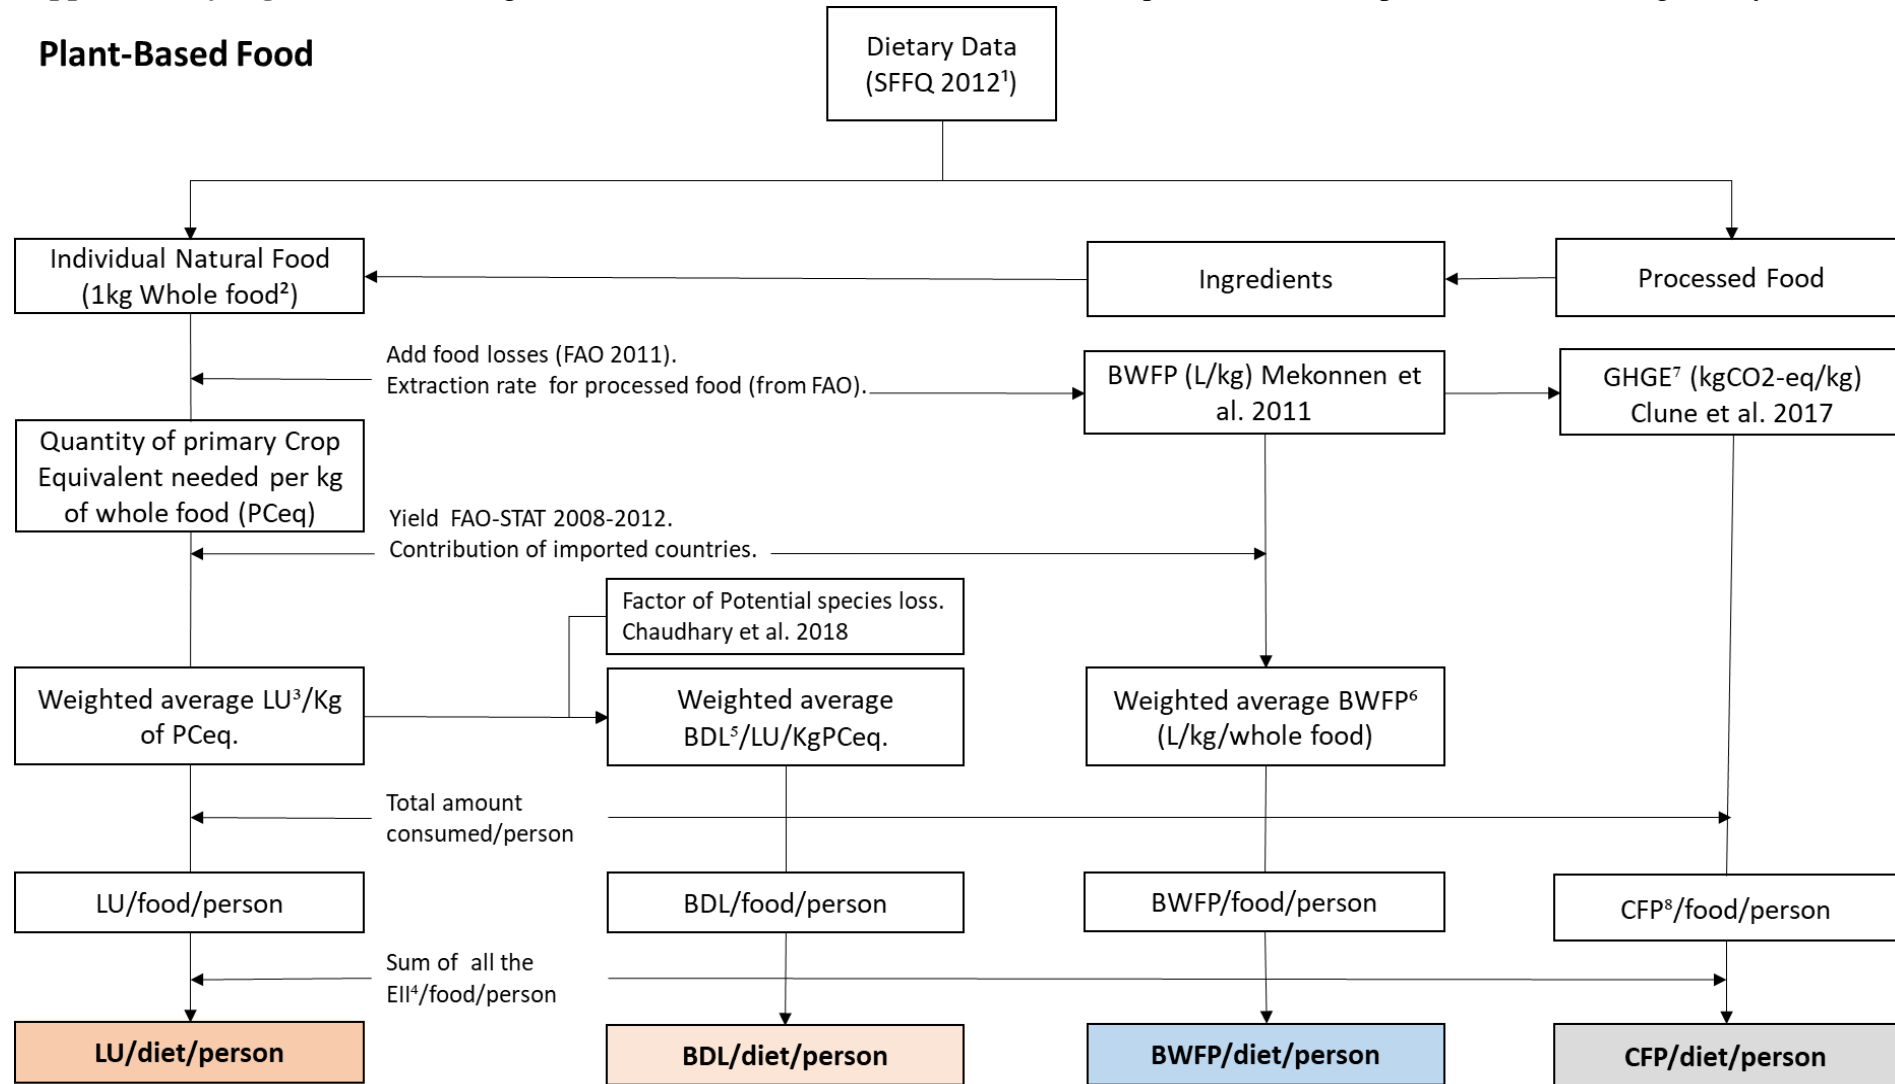

<sup>1</sup>Semi-quantitative food frequency questionnaire of the National Health and Nutrition Survey (ENSANUT-2012).

<sup>2</sup>Includes edible and non-edible portions (as purchased: with peel, seed, husk, etc.).

<sup>3</sup>Land use. <sup>4</sup>Environmental footprint per food consumed per person. <sup>5</sup>Biodiversity loss (potential number of species loss) (18). <sup>6</sup>Blue Water footprint (19). <sup>7</sup>Greenhouse gas emissions. <sup>8</sup>Carbon footprint (8).

**Supplementary Figure 5** Methodological scheme for estimation of environmental footprint indicators of animal-based food using dietary data from SFFQ

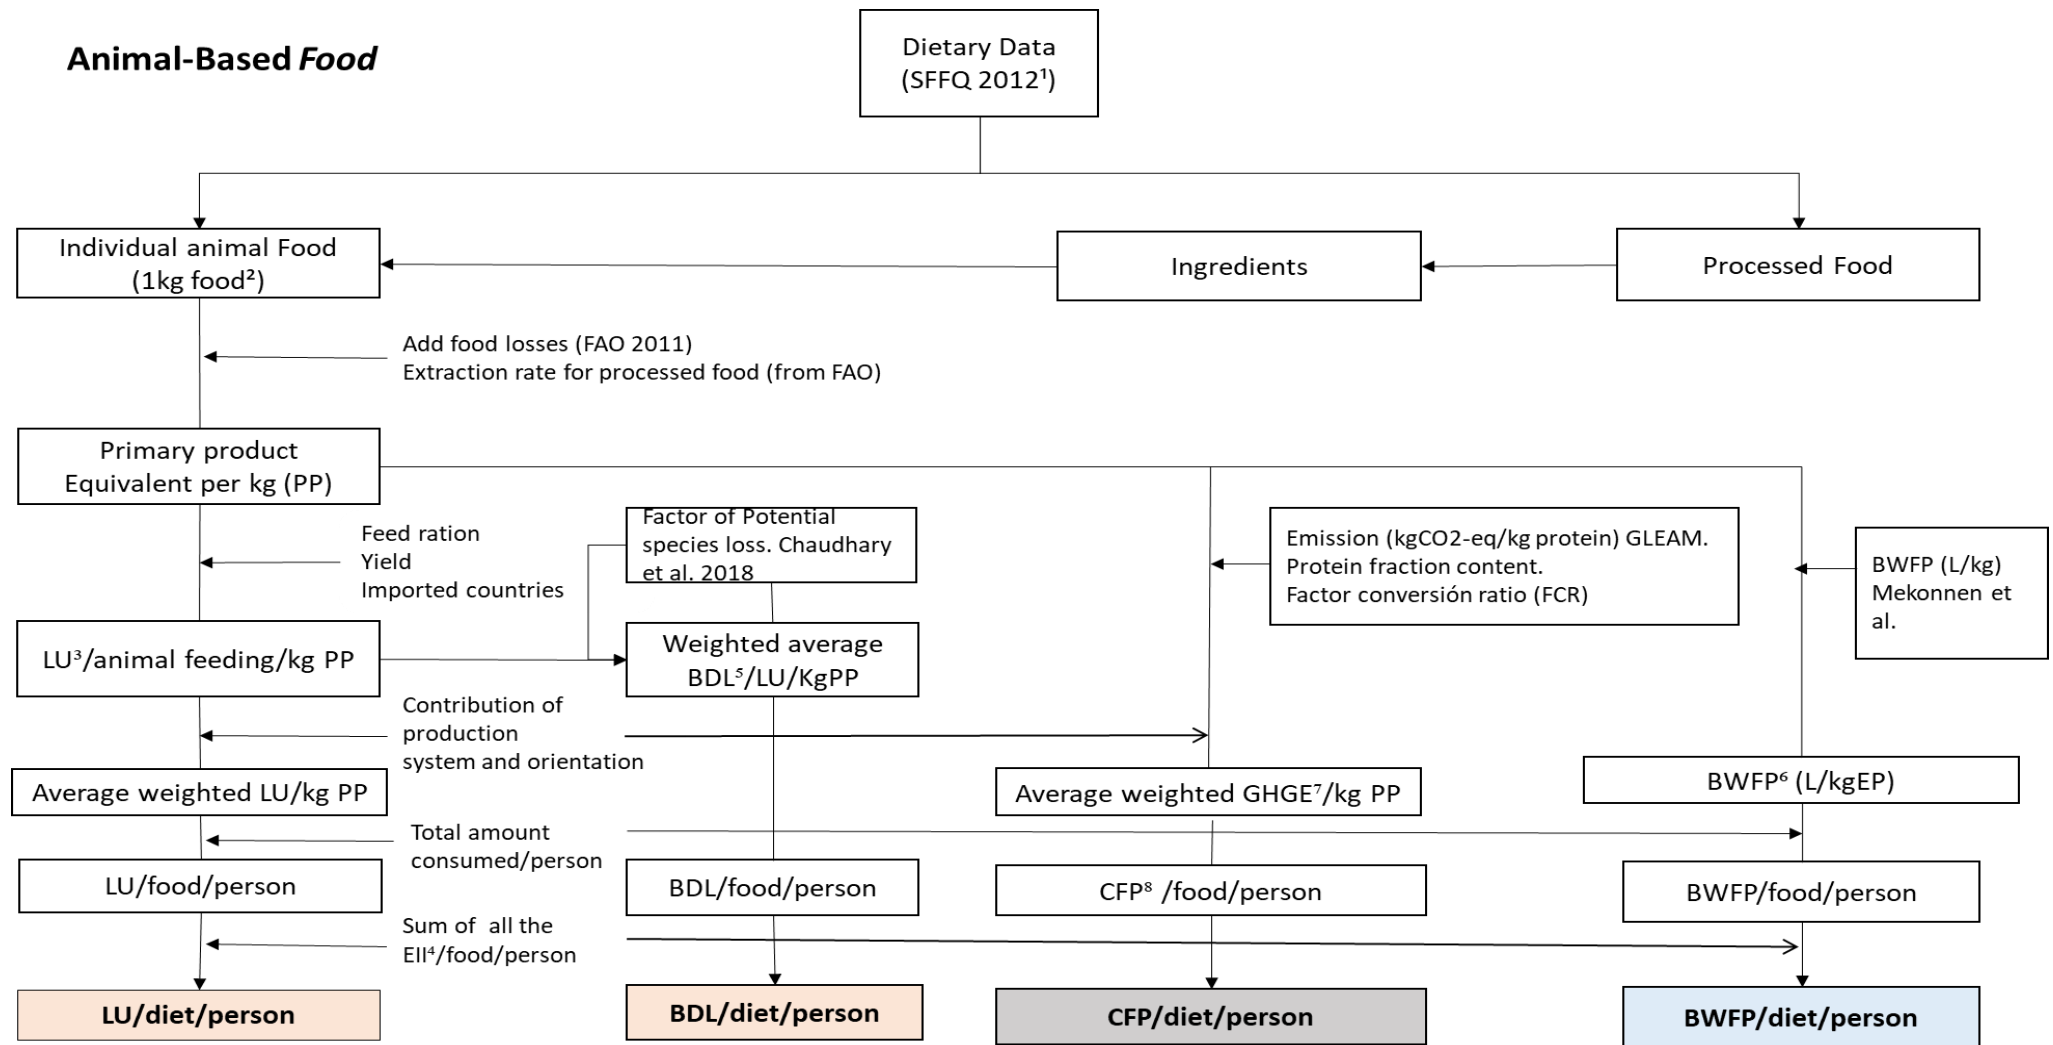

<sup>1</sup>Semi-quantitative food frequency questionnaire of the National Health and Nutrition Survey (ENSANUT-2012). <sup>2</sup>Includes edible and non-edible portions (as purchased: with peel, seed, husk, etc.) <sup>3</sup>Land use <sup>4</sup>Environmental footprint indicators per food consumed per person. <sup>5</sup>Biodiversity loss (potential number of species loss) (18). <sup>6</sup>Blue water footprint (19). <sup>7</sup>Greenhouse gas emissions. <sup>8</sup>Carbon footprint (8).

**Supplementary Table Supplementary Table 2.** Data used to calculate the environmental footprint indicators of plant-based food in SFFQ-ENSANUT 2012

| N° | Food_name (SFFQ)                    | Country of Production & Importers | Contribution to Food Supply (Fraction) | Primary Production Data from FAOSTAT (2008-2013) |                | % Food losses of Edible Mass in the Food Supply (FAO-2011 Latin-America) |         |              |                   |
|----|-------------------------------------|-----------------------------------|----------------------------------------|--------------------------------------------------|----------------|--------------------------------------------------------------------------|---------|--------------|-------------------|
|    |                                     |                                   |                                        | FAO-name                                         | Yield (Ton/Ha) | Post-Harvest                                                             | Process | Distribution | House Consumption |
| 1  | MAIZ BLANCO                         | Mexico                            | 1.00                                   | Maize                                            | 3.18           | 0.04                                                                     | 0.02    | 0.04         | 0.10              |
| 3  | MASA TRATADA CON CAL DE MAIZ BLANCO | Mexico                            | 1.00                                   | Maize                                            | 3.18           | 0.04                                                                     | 0.02    | 0.04         | 0.10              |
| 2  | FRIJOL NEGRO                        | México                            | 0.89                                   | Beans, dry                                       | 0.73           | 0.03                                                                     | 0.08    | 0.02         | 0.02              |
| 3  | FRIJOL NEGRO                        | USA (97.52%)                      | 0.11                                   | Beans dry                                        | 1.98           | 0.00                                                                     | 0.05    | 0.01         | 0.02              |
| 6  | AJO                                 | Mexico                            | 1.00                                   | Garlic                                           | 9.98           | 0.10                                                                     | 0.20    | 0.12         | 0.10              |
| 7  | CHICHARO                            | Mexico                            | 0.12                                   | Beans, green                                     | 9.25           | 0.10                                                                     | 0.20    | 0.12         | 0.10              |
| 8  | CHICHARO                            | USA (71.46)                       | 0.63                                   | Beans, green                                     | 4.68           | 0.04                                                                     | 0.02    | 0.12         | 0.10              |
| 9  | CHICHARO                            | Guatemala (20.82)                 | 0.19                                   | Beans, green                                     | 5.87           | 0.10                                                                     | 0.20    | 0.12         | 0.10              |
| 10 | Chile poblano                       | Mexico                            | 1.00                                   | Chilies and                                      | 15.56          | 0.10                                                                     | 0.20    | 0.12         | 0.10              |
| 11 | EJOTES                              | Mexico                            | 1.00                                   | String beans                                     | 9.78           | 0.03                                                                     | 0.08    | 0.02         | 0.02              |
| 12 | Nopales                             | Mexico                            | 1.00                                   | Leaves of prickly pear <sup>1</sup>              | 64.64          | 0.10                                                                     | 0.20    | 0.12         | 0.10              |
| 15 | Pepino                              | Mexico                            | 1.00                                   | Cucumbers and gherkins                           | 34.50          | 0.10                                                                     | 0.20    | 0.12         | 0.10              |
| 16 | ZANAHORIA                           | Mexico                            | 1.00                                   | Carrots and turnips                              | 25.98          | 0.10                                                                     | 0.20    | 0.12         | 0.10              |
| 17 | Fresa                               | Mexico                            | 1.00                                   | Strawberries                                     | 35.80          | 0.10                                                                     | 0.20    | 0.12         | 0.10              |
| 18 | Jícama                              | Mexico                            | 1.00                                   | Jicama (no FAO)                                  | 27.69          | 0.10                                                                     | 0.20    | 0.12         | 0.10              |
| 19 | Papaya                              | Mexico                            | 1.00                                   | Papaya                                           | 44.80          | 0.10                                                                     | 0.20    | 0.12         | 0.10              |
| 20 | Piña                                | Mexico                            | 1.00                                   | Pineapples                                       | 42.85          | 0.10                                                                     | 0.20    | 0.12         | 0.10              |
| 21 | PLATANO MACHO                       | Mexico                            | 1.00                                   | Bananas                                          | 28.72          | 0.10                                                                     | 0.20    | 0.12         | 0.10              |
| 22 | Toronja                             | Mexico                            | 1.00                                   | Grapefruit *inc pomelos                          | 23.62          | 0.10                                                                     | 0.20    | 0.12         | 0.10              |
| 23 | Uvas                                | Mexico                            | 1.00                                   | Grapes                                           | 11.63          | 0.10                                                                     | 0.20    | 0.12         | 0.10              |
| 25 | Palomitas de maíz                   | USA                               | 0.97                                   | Maize                                            | 9.29           | 0.04                                                                     | 0.02    | 0.04         | 0.10              |
| 26 | Palomitas de maíz                   | MEXICO                            | 0.03                                   | Maize                                            | 3.18           | 0.04                                                                     | 0.02    | 0.04         | 0.10              |
| 28 | MAIZ PRECOCIDO (PARA POZOLE)        | Mexico                            | 1.00                                   | Maize                                            | 3.18           | 0.04                                                                     | 0.02    | 0.04         | 0.10              |
| 30 | CHAMPIÑONES NATURALES               | Mexico                            | 1.00                                   | Mushrooms and truffles                           | 297.89         | 0.10                                                                     | 0.20    | 0.12         | 0.10              |
| 31 | CHILE GUAJILLO (fresh)              | Mexico                            | 1.00                                   | Chillies and peppers, green                      | 15.56          | 0.10                                                                     | 0.20    | 0.12         | 0.10              |
| 32 | Naranja o mandarina                 | Mexico                            | 1.00                                   | Orange                                           | 12.22          | 0.10                                                                     | 0.20    | 0.12         | 0.10              |
| 33 | Manzana o pera                      | Mexico                            | 0.77                                   | Apples                                           | 9.35           | 0.10                                                                     | 0.20    | 0.12         | 0.10              |
| 34 | Manzana o pera                      | USA (95.23%)                      | 0.23                                   | Apples                                           | 31.26          | 0.04                                                                     | 0.02    | 0.12         | 0.10              |
| 36 | Melón o sandía                      | Mexico                            | 1.00                                   | Watermelons                                      | 24.77          | 0.10                                                                     | 0.20    | 0.12         | 0.10              |
| 37 | Durazno/melocotón                   | Mexico                            | 0.81                                   | Peaches and nectarines                           | 4.86           | 0.10                                                                     | 0.20    | 0.12         | 0.10              |
| 38 | Durazno/melocotón                   | USA(83.75%)                       | 0.15                                   | Peaches and nectarines                           | 20.50          | 0.04                                                                     | 0.02    | 0.12         | 0.10              |
| 39 | Durazno/melocotón                   | CHILE (16.25%)                    | 0.04                                   | Peaches and nectarines                           | 19.58          | 0.10                                                                     | 0.20    | 0.12         | 0.10              |
| 41 | JITOMATE SALADET                    | Mexico                            | 1.00                                   | Tomatoes                                         | 30.01          | 0.10                                                                     | 0.20    | 0.12         | 0.10              |
| 42 | Chayote                             | Mexico                            | 1.00                                   | Pumpkins, squash and gourds                      | 16.79          | 0.10                                                                     | 0.20    | 0.12         | 0.10              |
| 43 | Calabacita                          | Mexico                            | 1.00                                   | Pumpkins, squash and gourds                      | 16.79          | 0.10                                                                     | 0.20    | 0.12         | 0.10              |

**Supplementary Table 2** (Continued). Data used to calculate the environmental footprint indicators of plant-based food in SFFQ-ENSANUT 2012

| N° | FAO-name                            | Primary Crop        | Primary Crop        | Non-Edible CF* (1/CF) | Factor from Edible to whole food | BDL Characterization factor | Water footprint | Clune et al.                  |
|----|-------------------------------------|---------------------|---------------------|-----------------------|----------------------------------|-----------------------------|-----------------|-------------------------------|
|    |                                     | Equivalent/kg whole | Equivalent/kg whole |                       |                                  |                             | Blue ( (L/kg))  | GHGE (kgCO <sub>2</sub> e/kg) |
| 1  | Maize                               | 1.23                | 1.16                | 1.00                  | 1.00                             | 5.40E-10                    | 61.76           | 0.63                          |
| 3  | Maize                               | 1.23                | 1.16                | 1.00                  | 1.00                             | 5.40E-10                    | 61.76           | 0.63                          |
| 2  | Beans, dry                          | 1.17                | 1.04                | 1.00                  | 1.00                             | 5.40E-10                    | 174.26          | 0.62                          |
| 3  | Beans dry                           | 1.08                | 1.03                | 1.00                  | 1.00                             | 7.00E-11                    | 427.9           | 0.62                          |
| 6  | Garlic                              | 1.75                | 1.26                | 0.97                  | 1.03                             | 5.40E-10                    | 474.95          | 0.57                          |
| 7  | Beans, green                        | 1.75                | 1.26                | 0.44                  | 2.27                             | 5.40E-10                    | 70.58           | 0.51                          |
| 8  | Beans, green                        | 1.34                | 1.26                | 0.44                  | 2.27                             | 5.40E-10                    | 133.91          | 0.51                          |
| 9  | Beans, green                        | 1.75                | 1.26                | 0.44                  | 2.27                             | 1.00E-09                    | 2.06            | 0.51                          |
| 10 | Chillies and                        | 1.75                | 1.26                | 0.80                  | 1.25                             | 5.40E-10                    | 81.72           | 0.60                          |
| 11 | String beans                        | 1.17                | 1.04                | 0.90                  | 1.11                             | 5.40E-10                    | 79.19           | 0.51                          |
| 12 | Leaves of prickly pear <sup>1</sup> | 1.75                | 1.26                | 0.78                  | 1.28                             | 5.40E-10                    | 161.77          | 0.47                          |
| 15 | Cucumbers and gherkins              | 1.75                | 1.26                | 0.83                  | 1.20                             | 5.40E-10                    | 31.21           | 0.33                          |
| 16 | Carrots and turnips                 | 1.75                | 1.26                | 0.82                  | 1.22                             | 5.40E-10                    | 49.28           | 0.22                          |
| 17 | Strawberries                        | 1.75                | 1.26                | 0.96                  | 1.04                             | 5.40E-10                    | 89.86           | 0.65                          |
| 18 | Jicama (no FAO)                     | 1.75                | 1.26                | 0.93                  | 1.08                             | 5.40E-10                    | 25.56           | 0.5                           |
| 19 | Papaya                              | 1.75                | 1.26                | 0.68                  | 1.47                             | 5.40E-10                    | 62.61           | 0.34                          |
| 20 | Pineapples                          | 1.75                | 1.26                | 0.53                  | 1.89                             | 5.40E-10                    | 23.46           | 0.72                          |
| 21 | Bananas                             | 1.75                | 1.26                | 0.58                  | 1.72                             | 5.40E-10                    | 180.66          | 0.79                          |
| 22 | Grapefruit *inc pomelos             | 1.75                | 1.26                | 0.66                  | 1.52                             | 5.40E-10                    | 118.71          | 0.5                           |
| 23 | Grapes                              | 1.75                | 1.26                | 0.68                  | 1.47                             | 5.40E-10                    | 97              | 0.41                          |
| 25 | Maize                               | 1.23                | 1.16                | 1.00                  | 1.00                             | 7.00E-11                    | 63.29           | 0.63                          |
| 26 | Maize                               | 1.23                | 1.16                | 1.00                  | 1.00                             | 5.40E-10                    | 61.76           | 0.63                          |
| 28 | Maize                               | 1.23                | 1.16                | 1.00                  | 1.00                             | 5.40E-10                    | 61.76           | 0.63                          |
| 30 | Mushrooms and truffles              | 1.75                | 1.26                | 1.00                  | 1.00                             | 5.40E-10                    | 161.77          | 0.27                          |
| 31 | Chillies and peppers, green         | 1.75                | 1.26                | 0.86                  | 1.16                             | 5.40E-10                    | 81.72           | 0.6                           |
| 32 | Orange                              | 1.75                | 1.26                | 0.71                  | 1.41                             | 5.40E-10                    | 217.27          | 0.35                          |
| 33 | Apples                              | 1.75                | 1.26                | 0.72                  | 1.39                             | 5.40E-10                    | 400.38          | 0.36                          |
| 34 | Apples                              | 1.34                | 1.26                | 0.72                  | 1.39                             | 7.00E-11                    | 243.89          | 0.36                          |
| 36 | Watermelons                         | 1.75                | 1.26                | 0.49                  | 2.04                             | 5.40E-10                    | 60.12           | 0.32                          |
| 37 | Peaches and nectarines              | 1.75                | 1.26                | 0.88                  | 1.14                             | 5.40E-10                    | 584.95          | 0.54                          |
| 38 | Peaches and nectarines              | 1.34                | 1.26                | 0.88                  | 1.14                             | 7.00E-11                    | 492.12          | 0.54                          |
| 39 | Peaches and nectarines              | 1.75                | 1.26                | 0.88                  | 1.14                             | 1.30E-10                    | 187.98          | 0.54                          |
| 41 | Tomatoes                            | 1.75                | 1.26                | 0.88                  | 1.14                             | 5.40E-10                    | 84.52           | 0.46                          |
| 42 | Pumpkins, squash and gourds         | 1.75                | 1.26                | 0.84                  | 1.19                             | 5.40E-10                    | 161.77          | 0.33                          |
| 43 | Pumpkins, squash and gourds         | 1.75                | 1.26                | 0.71                  | 1.41                             | 5.40E-10                    | 26.42           | 0.33                          |

**Supplementary Table 2 (Continued).** Data used to calculate the environmental footprint indicators of plant-based food in SFFQ-ENSANUT 2012

| N° | Food_name (SFFQ)                            | Country of Production & Importers | Contribution to Food Supply (Fraction) | Primary Production Data from FAOSTAT (2008-2013) |                | % Food losses of Edible Mass in the Food Supply (FAO-2011 Latin-America) |         |              |                   |
|----|---------------------------------------------|-----------------------------------|----------------------------------------|--------------------------------------------------|----------------|--------------------------------------------------------------------------|---------|--------------|-------------------|
|    |                                             |                                   |                                        | FAO-name                                         | Yield (Ton/Ha) | Post-Harvest                                                             | Process | Distribution | House Consumption |
| 44 | Brócoli o coliflor                          | Mexico                            | 1.00                                   | Cabbages and other brassicas                     | 32.75          | 0.10                                                                     | 0.20    | 0.12         | 0.10              |
| 45 | ELOTE BLANCO                                | Mexico                            | 1.00                                   | Maize, green                                     | 11.39          | 0.10                                                                     | 0.20    | 0.12         | 0.10              |
| 46 | Lechuga                                     | Mexico                            | 1.00                                   | Lettuce and chicory                              | 20.56          | 0.10                                                                     | 0.20    | 0.12         | 0.10              |
| 47 | Broccoli, raw                               | Mexico                            | 1.00                                   | Cabbages and other brassicas                     | 32.75          | 0.10                                                                     | 0.20    | 0.12         | 0.10              |
| 48 | Carrots, raw or frozen                      | Mexico                            | 1.00                                   | Carrots and turnips                              | 25.98          | 0.10                                                                     | 0.20    | 0.12         | 0.10              |
| 49 | Peas, green, raw                            | Mexico                            | 1.00                                   | Beans, green                                     | 4.85           | 0.10                                                                     | 0.20    | 0.12         | 0.10              |
| 51 | Chickpea                                    | Mexico                            | 1.00                                   | Chick peas                                       | 1.70           | 0.03                                                                     | 0.08    | 0.02         | 0.02              |
| 52 | Lentils                                     | Mexico                            | 1.00                                   | Lentils                                          | 0.95           | 0.03                                                                     | 0.08    | 0.02         | 0.02              |
| 53 | Lenteja, garbanzo, haba amarilla o alubia   | Mexico                            | 1.00                                   | Grouped beans mean                               | 1.32           | 0.03                                                                     | 0.08    | 0.02         | 0.02              |
| 54 | Cacahuates (peanut)                         | Mexico                            | 1.00                                   | Peanut                                           | 1.67           | 0.05                                                                     | 0.09    | 0.10         | 0.04              |
| 55 | Chiles frescos                              | Mexico                            | 1.00                                   | Chillies and peppers, green                      | 15.56          | 0.10                                                                     | 0.20    | 0.12         | 0.10              |
| 56 | Tomate verde y jitomate                     | Mexico                            | 1.00                                   | Tomatoes                                         | 30.01          | 0.10                                                                     | 0.20    | 0.12         | 0.10              |
| 57 | Cebolla                                     | Mexico                            | 1.00                                   | Onions, shallots, green                          | 11.69          | 0.10                                                                     | 0.20    | 0.12         | 0.10              |
| 58 | Plátano                                     | Mexico                            | 1.00                                   | Bananas                                          | 28.72          | 0.10                                                                     | 0.20    | 0.12         | 0.10              |
| 59 | Guayaba                                     | Mexico                            | 1.00                                   | Mangoes, mangosteens, guavas                     | 9.29           | 0.10                                                                     | 0.20    | 0.12         | 0.10              |
| 60 | Mango                                       | Mexico                            | 1.00                                   | Mangoes, mangosteens, guavas                     | 9.29           | 0.10                                                                     | 0.20    | 0.12         | 0.10              |
| 61 | Hojas Verdes (acelgas, espinacas, quelites) | Mexico                            | 1.00                                   | Spinach                                          | 11.98          | 0.10                                                                     | 0.20    | 0.12         | 0.10              |
| 62 | Col                                         | Mexico                            | 1.00                                   | Cabbages and other brassicas                     | 32.75          | 0.10                                                                     | 0.20    | 0.12         | 0.10              |
| 63 | AGUACATE MEAN                               | Mexico                            | 1.00                                   | Avocados                                         | 9.90           | 0.10                                                                     | 0.20    | 0.12         | 0.10              |
| 64 | PAPA AMARILLA                               | Mexico                            | 1.00                                   | Potatoes                                         | 27.26          | 0.10                                                                     | 0.20    | 0.12         | 0.10              |
| 65 | Limón                                       | Mexico                            | 1.00                                   | Lemons and limes                                 | 14.02          | 0.10                                                                     | 0.20    | 0.12         | 0.10              |
| 66 | Chile seco                                  | Mexico                            | 1.00                                   | Chillies and peppers, dry                        | 1.75           | 0.10                                                                     | 0.20    | 0.12         | 0.10              |
| 67 | Peper ground (pimienta molida)              | Mexico                            | 1.00                                   | Pepper *piper spp dry.                           | 1.51           | 0.10                                                                     | 0.20    | 0.12         | 0.10              |
| 68 | Soybean                                     | Mexico                            | 0.17                                   | Soybeans                                         | 1.61           | 0.03                                                                     | 0.08    | 0.02         | 0.02              |
| 69 | Soybean                                     | USA                               | 0.83                                   | Soybeans                                         | 2.81           | 0.00                                                                     | 0.05    | 0.01         | 0.04              |
| 71 | Tamarindo (to raw portion)                  | Mexico                            | 1.00                                   | Tamarindo "other tropical fruit"                 | 4.46           | 0.10                                                                     | 0.20    | 0.12         | 0.10              |
| 72 | Wheat                                       | Mexico                            | 1.00                                   | Wheat                                            | 5.31           | 0.04                                                                     | 0.02    | 0.04         | 0.10              |

**Supplementary Table 2** (Continued). Data used to calculate the environmental footprint indicators of plant-based food in SFFQ-ENSANUT 2012

| N° | FAO-name                         | Primary Crop        | Primary Crop        | Non-Edible CF* (1/CF) (INSP) | Factor from Edible to whole food | BDL Characterization factor | Water footprint | Clune et al.                  |
|----|----------------------------------|---------------------|---------------------|------------------------------|----------------------------------|-----------------------------|-----------------|-------------------------------|
|    |                                  | Equivalent/kg whole | Equivalent/kg whole |                              |                                  |                             | Blue ( L/kg)    | GHGE (kgCO <sub>2</sub> e/kg) |
| 44 | Cabbages and other brassicas     | 1.75                | 1.26                | 0.69                         | 1.45                             | 5.40E-10                    | 58.67           | 0.32                          |
| 45 | Maize, green                     | 1.75                | 1.26                | 0.59                         | 1.69                             | 5.40E-10                    | 90.19           | 0.63                          |
| 46 | Lettuce and chicory              | 1.75                | 1.26                | 0.75                         | 1.33                             | 5.40E-10                    | 49.01           | 0.38                          |
| 47 | Cabbages and other brassicas     | 1.75                | 1.26                | 0.69                         | 1.45                             | 5.40E-10                    | 58.67           | 0.32                          |
| 48 | Carrots and turnips              | 1.75                | 1.26                | 0.82                         | 1.22                             | 5.40E-10                    | 49.28           | 0.22                          |
| 49 | Beans, green                     | 1.75                | 1.26                | 0.44                         | 2.27                             | 5.40E-10                    | 200.29          | 0.51                          |
| 51 | Chick peas                       | 1.17                | 1.04                | 1.00                         | 1.00                             | 5.40E-10                    | 47.79           | 0.67                          |
| 52 | Lentils                          | 1.17                | 1.04                | 1.00                         | 1.00                             | 5.40E-10                    | 267.59          | 1.03                          |
| 53 | Grouped beans mean               | 1.17                | 1.04                | 1.00                         | 1.00                             | 5.40E-10                    | 139.38          | 0.85                          |
| 54 | Peanut                           | 1.34                | 1.16                | 0.84                         | 1.19                             | 5.40E-10                    | 2418.57         | 0.87                          |
| 55 | Chillies and peppers, green      | 1.75                | 1.26                | 0.86                         | 1.16                             | 5.40E-10                    | 81.72           | 0.6                           |
| 56 | Tomatoes                         | 1.75                | 1.26                | 0.89                         | 1.12                             | 5.40E-10                    | 84.52           | 0.46                          |
| 57 | Onions, shallots, green          | 1.75                | 1.26                | 0.81                         | 1.23                             | 5.40E-10                    | 87.29           | 0.18                          |
| 58 | Bananas                          | 1.75                | 1.26                | 0.58                         | 1.72                             | 5.40E-10                    | 180.66          | 0.79                          |
| 59 | Mangoes, mangosteens, guavas     | 1.75                | 1.26                | 0.83                         | 1.20                             | 5.40E-10                    | 427.76          | 0.5                           |
| 60 | Mangoes, mangosteens, guavas     | 1.75                | 1.26                | 0.59                         | 1.69                             | 5.40E-10                    | 427.76          | 0.5                           |
| 61 | Spinach                          | 1.75                | 1.26                | 0.81                         | 1.23                             | 5.40E-10                    | 97.68           | 0.54                          |
| 62 | Cabbages and other brassicas     | 1.75                | 1.26                | 0.80                         | 1.25                             | 5.40E-10                    | 58.67           | 0.32                          |
| 63 | Avocados                         | 1.75                | 1.26                | 0.53                         | 1.89                             | 5.40E-10                    | 265.5           | 1.3                           |
| 64 | Potatoes                         | 1.75                | 1.26                | 0.82                         | 1.22                             | 5.40E-10                    | 112.02          | 0.2                           |
| 65 | Lemons and limes                 | 1.75                | 1.26                | 0.64                         | 1.56                             | 5.40E-10                    | 196.45          | 0.3                           |
| 66 | Chillies and peppers, dry        | 1.75                | 1.26                | 1.00                         | 1.00                             | 5.40E-10                    | 2835.34         | 0.6                           |
| 67 | Pepper *piper spp dry.           | 1.75                | 1.26                | 1.00                         | 1.00                             | 5.40E-10                    | 954.29          | 0.6                           |
| 68 | Soybeans                         | 1.17                | 1.04                | 1.00                         | 1.00                             | 5.40E-10                    | 767.93          | 0.58                          |
| 69 | Soybeans                         | 1.11                | 1.05                | 1.00                         | 1.00                             | 5.40E-10                    | 162.04          | 0.58                          |
| 71 | Tamarindo "other tropical fruit" | 1.75                | 1.26                | 0.80                         | 1.25                             | 5.40E-10                    | 406.07          | 0.5                           |
| 72 | Wheat                            | 1.23                | 1.16                | 1.00                         | 1.00                             | 5.40E-10                    | 622.21          | 0.51                          |



**Supplementary Table 2** (Continued). Data used to calculate the environmental footprint indicators of animal-based food in SFFQ-ENSANUT 2012

| N° | FAO-name                | Primary Crop Equivalent/kg whole | Primary Crop Equivalent/kg whole | Non-Edible CF* (1/CF) (INSP) | Factor from Edible to whole food | BDL Characterization factor | Water footprint Blue ( L/kg) | Gleam GHGE (kgCO <sub>2</sub> e/kg) |
|----|-------------------------|----------------------------------|----------------------------------|------------------------------|----------------------------------|-----------------------------|------------------------------|-------------------------------------|
|    |                         |                                  |                                  |                              |                                  |                             |                              |                                     |
| 73 | Eggs                    | 1.00                             | 1.00                             | 0.88                         | 1.14                             | 1.10E-09                    | 294                          | 0.78                                |
| 74 | Bovine Meat             | 1.19                             | 1.12                             | 1.00                         | 1.00                             | 2.70E-08                    | 801                          | 56.12                               |
| 75 | Poultry Meat            | 1.19                             | 1.12                             | 1.00                         | 1.00                             | 2.30E-09                    | 364                          | 1.58                                |
| 76 | Poultry Meat            | 1.19                             | 1.12                             | 1.00                         | 1.00                             | 2.30E-09                    | 364                          | 1.58                                |
| 77 | Pigmeat                 | 1.19                             | 1.12                             | 1.00                         | 1.00                             | 5.60E-09                    | 837                          | 7.13                                |
| 78 | Poultry Meat            | 1.19                             | 1.12                             | 1.00                         | 1.00                             | 2.30E-09                    | 364                          | 1.58                                |
| 79 | Eggs                    | 1.00                             | 1.00                             | 0.88                         | 1.14                             | 1.10E-09                    | 294                          | 0.78                                |
| 80 | Lard                    | NE*                              | NE*                              | NE*                          | NE*                              | NE*                         | NE*                          | NE*                                 |
| 81 | Fresh fish              | 1.34                             | 1.16                             | 0.55                         | 1.82                             | ND                          | ND                           | 4.41                                |
| 82 | Milk - Excluding Butter | 1.23                             | 1.13                             | 1.00                         | 1.00                             | 9.80E-10                    | 139                          | 1.72                                |
| 83 | Milk - Excluding Butter | 1.23                             | 1.13                             | 1.00                         | 1.00                             | 9.80E-10                    | 139                          | 1.72                                |
| 84 | Milk - Excluding Butter | 1.23                             | 1.13                             | 1.00                         | 1.00                             | 9.80E-10                    | 139                          | 1.72                                |
| 85 | Dried fish (cod)        | 1.34                             | 1.16                             | 0.55                         | 1.82                             | ND                          | ND                           | 3.49                                |
| 86 | Shrimps                 | 1.34                             | 1.16                             | 0.82                         | 1.22                             | ND                          | ND                           | 4.41                                |
| 87 | Milk - Excluding Butter | 1.23                             | 1.13                             | 1.00                         | 1.00                             | 9.80E-10                    | 139                          | 1.72                                |
| 88 | Bovine Meat             | 1.19                             | 1.12                             | 1.00                         | 1.00                             | 2.70E-08                    | 801.46                       | 56.12                               |

\*Non-estimated

\*\*ND. No data for water footprint in Mekonnen et al. (19), instead we used an estimate from Poor et al. (20).

**Supplementary Table 3.** Data used to calculate the environmental footprint indicators of processed animal and plant-based food in SFFQ-ENSANUT 2012

| N° | Food_name (SFFQ)                        | Country of Production & Importers | Contribution to Food Supply (Fraction) | Primary Production Data from FAOSTAT (2008-2013) |                | % Food losses of Edible Mass in the Food Supply (FAO-2011 Latin-America) |         |              |                   | Extraction rate (FAO) | Primary Crop Equivalent/kg whole food (PCeq) LU | Primary Crop Equivalent/kg whole food (PCeq) GHGE | BDL Characterization factor (Intense LU) | Water footprint Mekonnen et al. |             |             |              | Clune et al. GHGE (kgCO2e/kg) |
|----|-----------------------------------------|-----------------------------------|----------------------------------------|--------------------------------------------------|----------------|--------------------------------------------------------------------------|---------|--------------|-------------------|-----------------------|-------------------------------------------------|---------------------------------------------------|------------------------------------------|---------------------------------|-------------|-------------|--------------|-------------------------------|
|    |                                         |                                   |                                        | FAO-name                                         | Yield (Ton/Ha) | Post-Harvest                                                             | Process | Distribution | House Consumption |                       |                                                 |                                                   |                                          | Green (L/kg)                    | Blue (L/kg) | Grey (L/kg) | Total (L/kg) |                               |
| 1  | ARROZ PULIDO (CRUDO)                    | Mexico                            | 0.22                                   | Rice, paddy                                      | 5.04           | 0.04                                                                     | 0.02    | 0.04         | 0.10              | 0.70                  | 1.76                                            | 1.65                                              | 5.40E-10                                 | 1788                            | 503         | 234         | 2525         | 2.66                          |
| 2  | ARROZ PULIDO (CRUDO)                    | USA                               | 0.78                                   | Rice, paddy                                      | 7.89           | 0.02                                                                     | 0.01    | 0.02         | 0.27              | 0.72                  | 1.99                                            | 1.94                                              | 7.00E-11                                 | 610                             | 1222        | 268         | 2099         | 2.66                          |
| 3  | Milled paddy rice for breakfast cereal  | Mexico                            | 0.22                                   | Rice, paddy                                      | 5.04           | 0.04                                                                     | 0.02    | 0.04         | 0.10              | 0.64                  | 1.93                                            | 1.82                                              | 5.40E-10                                 | 1946                            | 548         | 255         | 2749         | 2.66                          |
| 4  | Milled paddy rice for breakfast cereal  | USA                               | 0.78                                   | Rice, paddy                                      | 7.89           | 0.02                                                                     | 0.01    | 0.02         | 0.27              | 0.68                  | 2.10                                            | 2.04                                              | 5.40E-10                                 | 664                             | 1330        | 291         | 2285         | 2.66                          |
| 5  | HARINA DE MAIZ PARA ATOLE (MAICE)       | Mexico                            | 1.00                                   | Maize                                            | 3.18           | 0.04                                                                     | 0.02    | 0.04         | 0.10              | 0.86                  | 1.43                                            | 1.35                                              | 5.40E-10                                 | 1899                            | 63          | 366         | 2328         | 0.63                          |
| 6  | ACEITE DE CARTAMO (Cartamo oil)         | México                            | 0.80                                   | Safflower seed                                   | 1.48           | 0.03                                                                     | 0.08    | 0.02         | 0.02              | 0.39                  | 2.99                                            | 2.67                                              | 5.40E-10                                 | 7130                            | ND          | 91          | 7221         | 1.46                          |
| 7  | ACEITE DE CARTAMO (Cartamo oil)         | USA                               | 0.20                                   | Safflower seed                                   | 1.52           | 0.00                                                                     | 0.05    | 0.01         | 0.04              | 0.41                  | 2.70                                            | 2.57                                              | 7.00E-11                                 | 6339                            | 230         | 775         | 7345         | 1.46                          |
| 8  | ACEITE DE MAIZ                          | Mexico                            | 1.00                                   | Maize                                            | 3.18           | 0.04                                                                     | 0.02    | 0.04         | 0.10              | 0.40                  | 3.08                                            | 2.89                                              | 5.40E-10                                 | 3902                            | 130         | 752         | 4784         | 0.63                          |
| 9  | PILONCILLO                              | Mexico                            | 1.00                                   | Sugar cane                                       | 70.83          | 0.04                                                                     | 0.02    | 0.04         | 0.10              | 0.09                  | 13.37                                           | 12.58                                             | 5.40E-10                                 | 1147                            | 282         | 124         | 1553         | 3.21                          |
| 10 | PASTAS SIN ENRIQUECER                   | Mexico                            | 1.00                                   | Wheat                                            | 5.31           | 0.04                                                                     | 0.02    | 0.04         | 0.10              | 0.69                  | 1.78                                            | 1.68                                              | 5.40E-10                                 | 337                             | 565         | 187         | 1089         | 0.51                          |
| 11 | Rapeseed *colza/canola                  | Mexico                            | 0.75                                   | Rapeseed                                         | 1.37           | 0.03                                                                     | 0.08    | 0.02         | 0.02              | 0.36                  | 3.24                                            | 2.89                                              | 5.40E-10                                 | 6005                            |             | 73          | 6078         | 1.46                          |
| 12 | Rapeseed *colza/canola                  | USA                               | 0.25                                   | Rapeseed                                         | 1.76           | 0.00                                                                     | 0.05    | 0.01         | 0.04              | 0.38                  | 2.91                                            | 2.77                                              | 7.00E-11                                 | 5319                            | 39          | 712         | 6070         | 1.46                          |
| 13 | Azucar                                  | Mexico                            | 1.00                                   | Sugar cane                                       | 70.83          | 0.04                                                                     | 0.02    | 0.04         | 0.10              | 0.09                  | 13.37                                           | 12.58                                             | 5.40E-10                                 | 1147                            | 282         | 124         | 1553         | 3.21                          |
| 14 | Paletas y dulces de malvavisco (paleta) | Mexico                            | 1.00                                   | Sugar cane                                       | 70.83          | 0.04                                                                     | 0.02    | 0.04         | 0.10              | 0.09                  | 13.37                                           | 12.58                                             | 5.40E-10                                 | 1147                            | 282         | 124         | 1553         | 3.21                          |
| 15 | Dulce (caramelos, paletas)              | Mexico                            | 1.00                                   | Sugar cane                                       | 70.83          | 0.04                                                                     | 0.02    | 0.04         | 0.10              | 0.09                  | 13.37                                           | 12.58                                             | 5.40E-10                                 | 1147                            | 282         | 124         | 1553         | 3.21                          |
| 16 | Almond Unshelled to Shell almonds       | Mexico                            | 0.04                                   | Almonds with shell                               | 1.45           | 0.03                                                                     | 0.08    | 0.02         | 0.02              | 0.40                  | 2.92                                            | 2.60                                              | 5.40E-10                                 | 3511                            | 4190        | 370         | 8071         | 1.74                          |
| 17 | Almond Unshelled to Shell almonds       | USA (69%)                         | 0.69                                   | Almonds, with shell                              | 2.54           | 0.00                                                                     | 0.05    | 0.01         | 0.04              | 0.60                  | 1.85                                            | 1.75                                              | 7.00E-11                                 | 2342                            | 4075        | 6638        | 13055        | 1.74                          |
| 18 | Almond Unshelled to Shell almonds       | CHILE (27%)                       | 0.27                                   | Almonds, with shell                              | 2.80           | 0.03                                                                     | 0.08    | 0.02         | 0.02              | 0.35                  | 3.33                                            | 2.97                                              | 1.30E-10                                 | 8865                            | 3503        | 8197        | 20565        | 1.74                          |
| 19 | a) Té sin azúcar: Chamomile             | Mexico                            | 1.00                                   | Chamomile                                        | 6.96           | 0.10                                                                     | 0.20    | 0.12         | 0.10              | 0.78                  | 2.24                                            | 1.61                                              | 5.40E-10                                 | ND                              | ND          | ND          | 1047.92**    | 0.47                          |
| 20 | a) Café sin azúcar: Soluble coffe       | Mexico                            | 1.00                                   | Coffee, green *                                  | 0.34           | 0.10                                                                     | 0.20    | 0.12         | 0.10              | 0.38                  | 4.56                                            | 3.28                                              | 5.40E-10                                 | 27505                           | ND          | 816         | 28321        | 28.53                         |
| 21 | Sunflower oil                           | Mexico                            | 0.75                                   | Sunflower seed                                   | 1.47           | 0.03                                                                     | 0.08    | 0.02         | 0.02              | 0.39                  | 2.99                                            | 2.67                                              | 5.40E-10                                 | 7130                            | ND          | 91          | 7221         | 3.6                           |
| 22 | Sunflower oil                           | ARGENTINA                         | 0.18                                   | Sunflower seed                                   | 1.72           | 0.03                                                                     | 0.08    | 0.02         | 0.02              | 0.40                  | 2.92                                            | 2.60                                              | 3.60E-11                                 | 5391                            | 23          | 52          | 5466         | 3.6                           |
| 23 | Sunflower oil                           | USA (24%)                         | 0.06                                   | Sunflower seed                                   | 1.64           | 0.00                                                                     | 0.05    | 0.01         | 0.04              | 0.41                  | 2.70                                            | 2.57                                              | 7.00E-11                                 | 6339                            | 230         | 775         | 7345         | 3.6                           |
| 24 | Palm oil                                | Mexico                            | 0.62                                   | Oil palm fruit                                   | 13.53          | 0.03                                                                     | 0.08    | 0.02         | 0.02              | 0.24                  | 4.86                                            | 4.34                                              | 5.40E-10                                 | 3261                            | ND          | 412         | 3672         | 7.32                          |
| 25 | Palm oil                                | COSTA RICA                        | 0.13                                   | Oil palm fruit                                   | 17.01          | 0.03                                                                     | 0.08    | 0.02         | 0.02              | 0.24                  | 4.86                                            | 4.34                                              | 2.60E-09                                 | 3399                            | ND          | 68          | 3467         | 7.32                          |
| 26 | Palm oil                                | GUATEMALA                         | 0.12                                   | Oil palm fruit                                   | 16.70          | 0.03                                                                     | 0.08    | 0.02         | 0.02              | 0.14                  | 8.33                                            | 7.44                                              | 1.00E-09                                 | 2559                            | ND          | 58          | 2618         | 7.32                          |
| 27 | Palm oil                                | HONDURAS                          | 0.12                                   | Oil palm fruit                                   | 16.70          | 0.03                                                                     | 0.08    | 0.02         | 0.02              | 0.18                  | 6.48                                            | 5.78                                              | 8.20E-10                                 | 3251                            | ND          | 120         | 3371         | 7.32                          |
| 28 | Soybean oil                             | México                            | 0.17                                   | Soybeans                                         | 1.61           | 0.03                                                                     | 0.08    | 0.02         | 0.02              | 0.16                  | 7.29                                            | 6.51                                              | 5.40E-10                                 | 3129                            | 438         | ND          | 3567         | 6.32                          |
| 29 | Soybean oil                             | USA                               | 0.83                                   | Soybeans                                         | 2.81           | 0.00                                                                     | 0.05    | 0.01         | 0.04              | 0.19                  | 5.83                                            | 5.54                                              | 7.00E-11                                 | 1560                            | 92          | 10          | 1662         | 6.32                          |

\*The extraction ratio to estimate the equivalent primary crop of green coffee per kg of soluble coffee was based on the document conversions and statistics for world trade in coffee (<http://www.intracen.org/guia-del-cafe/el-comercio-mundial-del-cafe/Conversiones-y-estadisticas/>) (21).

\*\*ND. No data for water footprint in Mekonnen et al. (18), instead we estimated WFP based on comparison of tea and coffee (21% x WFP of coffee).

**Supplementary Table 3 (Continued).** Data used to calculate the environmental footprint indicators of processed animal and plant-food in SFFQ-ENSANUT 2012

| N° | Food_name (SFFQ)                            | Country of Production & Importers | Contribution to Food Supply (Fraction) | Primary Production Data from FAOSTAT (2008-2013) |                | % Food losses of Edible Mass in the Food Supply (FAO-2011 Latin-America) |         |              |                   | Extraction rate (FAO) | Primary Crop Equivalent/kg whole food (PCeq) LU | Primary Crop Equivalent/kg whole food (PCeq) LU | BDL Characterization factor (Intense LU) | Water footprint Mekonnen et al. |             |             |              | Clune et al. GHGE (kgCO2e/kg) |
|----|---------------------------------------------|-----------------------------------|----------------------------------------|--------------------------------------------------|----------------|--------------------------------------------------------------------------|---------|--------------|-------------------|-----------------------|-------------------------------------------------|-------------------------------------------------|------------------------------------------|---------------------------------|-------------|-------------|--------------|-------------------------------|
|    |                                             |                                   |                                        | FAO-name                                         | Yield (Ton/Ha) | Post-Harvest                                                             | Process | Distribution | House Consumption |                       |                                                 |                                                 |                                          | Green (L/kg)                    | Blue (L/kg) | Grey (L/kg) | Total (L/kg) |                               |
| 30 | Olive oil                                   | España                            | 0.77                                   | Olives                                           | 2.54           | 0.01                                                                     | 0.05    | 0.01         | 0.04              | 0.21                  | 5.33                                            | 5.01                                            | 6.90E-10                                 | 10809                           | 2623        | 26          | 13458        | 5.42                          |
| 32 | Cacao paste                                 | Mexico                            | 1.00                                   | Cocoa beans                                      | 0.59           | 0.10                                                                     | 0.20    | 0.12         | 0.10              | 0.80                  | 2.19                                            | 1.58                                            | 5.40E-10                                 | 23618                           | ND          | 705         | 24323        | 8.00*                         |
| 33 | Cocoa Powdered                              | Mexico                            | 1.00                                   | Cocoa beans                                      | 0.59           | 0.10                                                                     | 0.20    | 0.12         | 0.10              | 0.42                  | 4.14                                            | 2.98                                            | 5.40E-10                                 | 15236                           | ND          | 455         | 15691        | 8.00*                         |
| 34 | Oats rolled                                 | Mexico                            | 1.00                                   | Oats                                             | 1.54           | 0.04                                                                     | 0.02    | 0.04         | 0.10              | 0.58                  | 2.12                                            | 2.00                                            | 5.40E-10                                 | 1610                            | 2037        | 77          | 3724         | 0.44                          |
| 35 | Wheat (CEREAL FOR READY TO EAT CEREAL)      | Mexico                            | 1.00                                   | Wheat                                            | 5.31           | 0.04                                                                     | 0.02    | 0.04         | 0.10              | 0.69                  | 1.78                                            | 1.68                                            | 5.40E-10                                 | 371                             | 622         | 206         | 1199         | 0.51                          |
| 36 | Wheat (BREAD)                               | Mexico                            | 1.00                                   | Wheat                                            | 5.31           | 0.04                                                                     | 0.02    | 0.04         | 0.10              | 0.69                  | 1.78                                            | 1.61                                            | 5.40E-10                                 | 293                             | 491         | 163         | 947          | 0.51                          |
| 37 | Leche sin lactosa descremada (Otra leche)   | México                            | 1.00                                   | Milk EXC. Butter                                 |                | 0.06                                                                     | 0.02    | 0.08         | 0.04              | 1.00                  | 1.23                                            | 1.13                                            | 9.80E-10                                 | 1586                            | 134         | 117         | 1838         | 1.72                          |
| 38 | Leche semidescremada (Otra leche)           | México                            | 1.00                                   | Milk EXC. Butter                                 |                | 0.06                                                                     | 0.02    | 0.08         | 0.04              | 1.00                  | 1.23                                            | 1.13                                            | 9.80E-10                                 | 1639                            | 139         | 121         | 1899         | 1.72                          |
| 39 | Leche descremada (Otra leche)               | México                            | 1.00                                   | Milk EXC. Butter                                 |                | 0.06                                                                     | 0.02    | 0.08         | 0.04              | 1.00                  | 1.23                                            | 1.13                                            | 9.80E-10                                 | 1586                            | 134         | 117         | 1838         | 1.72                          |
| 40 | Leche liconsa (semi skim milk)              | México                            | 1.00                                   | Milk EXC. Butter                                 |                | 0.06                                                                     | 0.02    | 0.08         | 0.04              | 1.00                  | 1.23                                            | 1.13                                            | 9.80E-10                                 | 1639                            | 139         | 121         | 1899         | 1.72                          |
| 41 | Leche evaporada descremada (Otra leche)     | México                            | 1.00                                   | Milk EXC. Butter                                 |                | 0.06                                                                     | 0.02    | 0.08         | 0.04              | 0.32                  | 3.84                                            | 3.54                                            | 9.80E-10                                 | 1586                            | 134         | 117         | 1838         | 1.72                          |
| 42 | Leche evaporada entera (Otra leche)         | México                            | 1.00                                   | Milk EXC. Butter                                 |                | 0.06                                                                     | 0.02    | 0.08         | 0.04              | 0.32                  | 3.84                                            | 3.54                                            | 9.80E-10                                 | 1639                            | 139         | 121         | 1899         | 1.72                          |
| 43 | Leche en polvo entera (Otra leche)          | México                            | 1.00                                   | Milk EXC. Butter                                 |                | 0.06                                                                     | 0.02    | 0.08         | 0.04              | 0.12                  | 10.24                                           | 9.44                                            | 9.80E-10                                 | 7377                            | 625         | 545         | 8546         | 1.72                          |
| 44 | Leche en polvo descremada (Otra leche)      | México                            | 1.00                                   | Milk EXC. Butter                                 |                | 0.06                                                                     | 0.02    | 0.08         | 0.04              | 0.12                  | 10.24                                           | 9.44                                            | 9.80E-10                                 | 7377                            | 625         | 545         | 8546         | 1.72                          |
| 45 | Leche en polvo entera                       | México                            | 1.00                                   | Milk EXC. Butter                                 |                | 0.06                                                                     | 0.02    | 0.08         | 0.04              | 0.12                  | 10.24                                           | 9.44                                            | 9.80E-10                                 | 7377                            | 625         | 545         | 8546         | 1.72                          |
| 46 | Queso panela o fresco o cottage             | México                            | 1.00                                   | Milk EXC. Butter                                 |                | 0.06                                                                     | 0.02    | 0.08         | 0.04              | 0.10                  | 12.29                                           | 11.32                                           | 9.80E-10                                 | 4941                            | 418         | 365         | 5724         | 1.72                          |
| 47 | Quesos madurados (chihuahua, manchego, gou) | México                            | 1.00                                   | Milk EXC. Butter                                 |                | 0.06                                                                     | 0.02    | 0.08         | 0.04              | 0.10                  | 12.29                                           | 11.32                                           | 9.80E-10                                 | 7843                            | 680         | 579         | 9101         | 1.72                          |
| 48 | Mantequilla                                 | México                            | 1.00                                   | Butter                                           |                | 0.06                                                                     | 0.02    | 0.08         | 0.04              | 0.05                  | 24.58                                           | 22.64                                           | 9.10E-10                                 | 2486                            | 210         | 184         | 2880         | 11.52                         |

\* No data for carbon footprint in Clune et al. (8), instead we used an estimate from Ortiz-Rodríguez et al. (<https://www.scielo.br/pdf/eagri/v36n2/1809-4430-eagri-36-2-0260.pdf>)

**Supplementary Table 4.** Feed ration composition (%) for meat and dairy by production system, based on GLEAM-i data for Mexico

| ORIENTATION<br>PRODUCTION SYSTEM | MEAT PRODUCTION |                            |                                     |               |                            |                                     | DAIRY PRODUCTION |                            |                                     |               |                            |                                     |
|----------------------------------|-----------------|----------------------------|-------------------------------------|---------------|----------------------------|-------------------------------------|------------------|----------------------------|-------------------------------------|---------------|----------------------------|-------------------------------------|
|                                  | Grassland       |                            |                                     | Mixed         |                            |                                     | Grassland        |                            |                                     | Mixed         |                            |                                     |
| Feed Ration components           | Adult Females   | Meat animals (non feedlot) | Replacement animals and adult males | Adult Females | Meat animals (non feedlot) | Replacement animals and adult males | Adult Females    | Meat animals (non feedlot) | Replacement animals and adult males | Adult Females | Meat animals (non feedlot) | Replacement animals and adult males |
| By-products from cottonseed      | 0.16            | 0.23                       | 0.16                                | 0.39          | 0.78                       | 0.39                                | 0.78             | 0.23                       | 0.16                                | 1.17          | 0.78                       | 0.78                                |
| By-products from rape            | 0.13            | 0.2                        | 0.13                                | 0.33          | 0.66                       | 0.33                                | 0.66             | 0.2                        | 0.13                                | 0.99          | 0.66                       | 0.66                                |
| By-products from soy             | 0.05            | 1.08                       | 0.05                                | 0.14          | 1.77                       | 0.14                                | 1.27             | 1.08                       | 0.05                                | 1.91          | 1.77                       | 0.27                                |
| By-products from sugar beet      |                 |                            |                                     |               |                            |                                     | 0                | 0                          | 0                                   | 0             | 0                          | 0                                   |
| Crop residues from maize         | 5.42            | 4.81                       | 5.42                                | 5.26          | 4.15                       | 5.26                                | 4.43             | 4.81                       | 5.42                                | 3.87          | 4.15                       | 4.98                                |
| Crop residues from millet        |                 |                            |                                     |               |                            |                                     | 0                | 0                          | 0                                   | 0             | 0                          | 0                                   |
| Crop residues from other         | 4.12            | 3.65                       | 4.12                                | 3.99          | 3.15                       | 3.99                                | 3.36             | 3.65                       | 4.12                                | 2.94          | 3.15                       | 3.78                                |
| Crop residues from rice          | 10.44           | 9.27                       | 10.44                               | 10.12         | 7.99                       | 10.12                               | 8.53             | 9.27                       | 10.44                               | 7.46          | 7.99                       | 9.59                                |
| Crop residues from sorghum       | 6.64            | 5.89                       | 6.64                                | 6.43          | 5.08                       | 6.43                                | 5.42             | 5.89                       | 6.64                                | 4.74          | 5.08                       | 6.1                                 |
| Crop residues from               | 9.72            | 8.63                       | 9.72                                | 9.42          | 7.44                       | 9.42                                | 7.93             | 8.63                       | 9.72                                | 6.94          | 7.44                       | 8.93                                |
| Crop residues from wheat         | 11.46           | 10.18                      | 11.46                               | 11.11         | 8.77                       | 11.11                               | 9.36             | 10.18                      | 11.46                               | 8.19          | 8.77                       | 10.53                               |
| Dry by-product from grain        | 0.14            | 1.71                       | 0.14                                | 0.35          | 2.94                       | 0.35                                | 2.19             | 1.71                       | 0.14                                | 3.29          | 2.94                       | 0.69                                |
| Fodder beet                      | 13.95           | 12.38                      | 13.95                               | 13.52         | 10.68                      | 13.52                               | 11.39            | 12.38                      | 13.95                               | 9.96          | 10.68                      | 12.81                               |
| Fresh grass                      | 1.95            | 1.73                       | 1.95                                | 1.89          | 1.49                       | 1.89                                | 1.59             | 1.73                       | 1.95                                | 1.39          | 1.49                       | 1.79                                |
| Fresh mixture of grass and       | 5.9             | 5.24                       | 5.9                                 | 5.72          | 4.52                       | 5.72                                | 4.82             | 5.24                       | 5.9                                 | 4.21          | 4.52                       | 5.42                                |
| Grains                           | 0               | 5                          | 0                                   | 0             | 7.5                        | 0                                   | 5                | 5                          | 0                                   | 7.5           | 7.5                        | 0                                   |
| Hay from adjacent areas          |                 |                            |                                     |               |                            |                                     |                  |                            |                                     |               |                            |                                     |
| Hay or silage from alfalfa       | 5.9             | 5.24                       | 5.9                                 | 5.72          | 4.52                       | 5.72                                | 4.82             | 5.24                       | 5.9                                 | 4.21          | 4.52                       | 5.42                                |
| Hay or silage from cultivated    | 1.98            | 1.75                       | 1.98                                | 1.92          | 1.51                       | 1.92                                | 1.61             | 1.75                       | 1.98                                | 1.41          | 1.51                       | 1.82                                |
| Hay or silage from grass and     | 1.98            | 1.75                       | 1.98                                | 1.92          | 1.51                       | 1.92                                | 1.61             | 1.75                       | 1.98                                | 1.41          | 1.51                       | 1.82                                |
| Leaves from natural              |                 |                            |                                     |               |                            |                                     |                  |                            |                                     |               |                            |                                     |
| Maize                            | 0               | 2                          | 0                                   | 0             | 3                          | 0                                   | 2                | 2                          | 0                                   | 3             | 3                          | 0                                   |
| Maize gluten feed                |                 |                            |                                     |               |                            |                                     | 0                | 0                          | 0                                   | 0             | 0                          | 0                                   |
| Maize gluten meal                | 0               | 0.5                        | 0                                   | 0             | 0.75                       | 0                                   | 0.5              | 0.5                        | 0                                   | 0.75          | 0.75                       | 0                                   |
| Molasses                         | 1.13            | 1.7                        | 1.13                                | 2.83          | 5.67                       | 2.83                                | 5.67             | 1.7                        | 1.13                                | 8.5           | 5.67                       | 5.67                                |
| Oil palm kernel expeller         | 0.39            | 0.58                       | 0.39                                | 0.96          | 1.93                       | 0.96                                | 1.93             | 0.58                       | 0.39                                | 2.89          | 1.93                       | 1.93                                |
| Silage from whole grain          | 11.84           | 10.51                      | 11.84                               | 11.47         | 9.06                       | 11.47                               | 9.66             | 10.51                      | 11.84                               | 8.45          | 9.06                       | 10.87                               |
| Silage from whole maize          | 6.71            | 5.96                       | 6.71                                | 6.51          | 5.14                       | 6.51                                | 5.48             | 5.96                       | 6.71                                | 4.79          | 5.14                       | 6.16                                |
| Wet by-product from grain        | 0               | 0                          | 0                                   |               |                            |                                     | 0                | 0                          | 0                                   | 0             | 0                          | 0                                   |

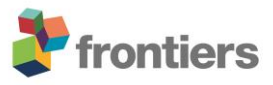

*Source: GLEAM-interactive tool for México (23).*

**Supplementary Table 5.** Average feed ratio composition (%) for meat and dairy by production system, based on GLEAM-i data for Mexico

| Cattle production                                 | Meat Production |            | Milk Production |            |
|---------------------------------------------------|-----------------|------------|-----------------|------------|
|                                                   | Grassland       | Mixed      | Grassland       | Mixed      |
| <b>Feed component (% of total DM feed intake)</b> |                 |            |                 |            |
| <b>Crop for grains:</b>                           | 2.33            | 3.50       | 4.67            | 7.00       |
| Grains                                            | 1.67            | 2.50       | 3.33            | 5.00       |
| Maize                                             | 0.67            | 1.00       | 1.33            | 2.00       |
| <b>Total forrage - pastures</b>                   | 48.33           | 45.26      | 45.25           | 40.12      |
| Fodder beet                                       | 13.43           | 12.57      | 12.57           | 11.15      |
| Fresh grass                                       | 1.88            | 1.76       | 1.76            | 1.56       |
| Fresh mixture of grass and legumes                | 5.68            | 5.32       | 5.32            | 4.72       |
| Hay or silage from alfalfa                        | 5.68            | 5.32       | 5.32            | 4.72       |
| Hay or silage from cultivated grass               | 1.90            | 1.78       | 1.78            | 1.58       |
| Hay or silage from grass and legumes              | 1.90            | 1.78       | 1.78            | 1.58       |
| Silage from whole grain plants.                   | 11.40           | 10.67      | 10.67           | 9.46       |
| Silage from whole maize plant                     | 6.46            | 6.05       | 6.05            | 5.36       |
| <b>Total by-products</b>                          | 3.33            | 8.17       | 7.00            | 14.67      |
| By-products from cottonseed                       | 0.18            | 0.52       | 0.39            | 0.91       |
| By-products from rape (canola)                    | 0.15            | 0.44       | 0.33            | 0.77       |
| By-products from soy                              | 0.39            | 0.68       | 0.80            | 1.32       |
| Dry by-product from grain industries              | 0.66            | 1.21       | 1.35            | 2.31       |
| Maize gluten meal                                 | 0.17            | 0.25       | 0.33            | 0.50       |
| Molasses                                          | 1.32            | 3.78       | 2.83            | 6.61       |
| Oil palm kernel expeller                          | 0.45            | 1.28       | 0.97            | 2.25       |
| <b>Total crop residues</b>                        | 46.01           | 43.08      | 43.09           | 38.21      |
| Crop residues from maize                          | 5.22            | 4.89       | 4.89            | 4.33       |
| Crop residues from other grains                   | 3.96            | 3.71       | 3.71            | 3.29       |
| Crop residues from rice                           | 10.05           | 9.41       | 9.41            | 8.35       |
| Crop residues from sorghum                        | 6.39            | 5.98       | 5.98            | 5.31       |
| Crop residues from sugarcane                      | 9.36            | 8.76       | 8.76            | 7.77       |
| Crop residues from wheat                          | 11.03           | 10.33      | 10.33           | 9.16       |
| <b>TOTAL</b>                                      | <b>100</b>      | <b>100</b> | <b>100</b>      | <b>100</b> |



*Source: GLEAM-interactive tool for México (23).*

**Supplementary Table 6.** Feed ratio composition (%) for chicken and pig by production system, based on GLEAM-i data for Mexico

| Production systems                                                     | Chicken       |              |               | Pig          |               |               |
|------------------------------------------------------------------------|---------------|--------------|---------------|--------------|---------------|---------------|
|                                                                        | Meat Broiler  | Egg Backyard | Egg Layers    | Backyard     | Intermediate  | Industrial    |
| <b>Grains:</b>                                                         | <b>71</b>     | <b>33.08</b> | <b>72</b>     | <b>41.3</b>  | <b>58.45</b>  | <b>64</b>     |
| Grains from barley ( <i>Hordeum vulgare</i> )                          | 0             | 4.03         | 0             | 5.07         | 8.66          | 10            |
| Grains from maize ( <i>Zea mays</i> )                                  | 71            | 5.36         | 7             | 6.88         | 16.21         | 20            |
| Grains from rice                                                       | 0             | 8.58         | 0             | 10.38        | 3.54          | 0             |
| Grains from sorghum                                                    | 0             | 6.4          | 65            | 7.74         | 2.64          | 0             |
| Grains from wheat ( <i>Triticum aestivum</i> ).                        | 0             | 8.71         | 0             | 11.23        | 27.4          | 34            |
| <b>Legumes:</b>                                                        | <b>0</b>      | <b>3.65</b>  | <b>0</b>      | <b>4.42</b>  | <b>1.5</b>    | <b>0</b>      |
| Beans from soy                                                         | 0             | 2.26         | 0             | 2.74         | 0.93          | 0             |
| Leguminous beans                                                       | 0             | 1.39         | 0             | 1.68         | 0.57          | 0             |
| <b>Forrages and fruit:</b>                                             | <b>0</b>      | <b>8.93</b>  | <b>0</b>      | <b>1.99</b>  | <b>0.68</b>   | <b>0</b>      |
| Fruit from banana trees                                                | 0             | 1.64         | 0             | 1.99         | 0.68          | 0             |
| Fresh grass                                                            | 0             | 7.29         | 0             |              |               |               |
| <b>Total by-products</b>                                               | <b>27</b>     | <b>17.47</b> | <b>20</b>     | <b>21.75</b> | <b>28.21</b>  | <b>30</b>     |
| By-product from oil production other than soy, cottonseed or palm oil. | 0             | 2.9          | 10            | 3.71         | 8.2           | 10            |
| By-products from cottonseed                                            | 0             | 6.51         | 0             | 7.88         | 2.69          | 0             |
| By-products from soy (cake)                                            | 27            | 2.26         | 10            | 3.04         | 11.43         | 15            |
| Dry by-product from grain industries                                   | 0             | 5.8          | 0             | 7.12         | 5.89          | 5             |
| - Maiz yellow (bran)                                                   |               |              |               |              |               |               |
| - Wheat (bran)                                                         |               |              |               |              |               |               |
| <b>Total crop residues and household waste</b>                         | <b>0</b>      | <b>36.86</b> | <b>0</b>      | <b>30.41</b> | <b>6.96</b>   | <b>0</b>      |
| Crop residue from leguminous plants cultivation                        | 0             | 3.21         | 0             | 3.89         | 1.33          | 0             |
| Crop residues from sugarcane                                           | 0             | 12.01        | 0             | 14.53        | 4.95          | 0             |
| Household food waste and other organic material used as feed           | 0             | 20           | 0             | 10           |               |               |
| Residual plant material such as stems from banana                      | 0             | 1.64         | 0             | 1.99         | 0.68          | 0             |
| <b>Excluded diet components</b>                                        | <b>2</b>      | <b>0</b>     | <b>8</b>      | <b>0.12</b>  | <b>4.2</b>    | <b>6</b>      |
| Limestone                                                              |               | 0            |               |              |               |               |
| SYNTHETIC                                                              |               | 0            |               | 0.04         | 1.4           | 2             |
| FISHMEAL                                                               |               |              |               | 0.08         | 2.8           | 4             |
| <b>Total</b>                                                           | <b>100.00</b> | <b>99.99</b> | <b>100.00</b> | <b>99.99</b> | <b>100.00</b> | <b>100.00</b> |



Source: GLEAM-interactive tool for México (23).

**Supplementary Table 7.** Parameters for cattle production used in estimation of environmental footprint indicators by orientation and production system, based on GLEAM-i data for Mexico

| Parameters for Cattle production<br>(GLEAM 2010)                                                                      | Unit        | Meat Orientation  |                   | Dairy Orientation |                  |
|-----------------------------------------------------------------------------------------------------------------------|-------------|-------------------|-------------------|-------------------|------------------|
|                                                                                                                       |             | Grassland System  | Mixed System      | Grassland System  | Mixed System     |
| Total feed intake                                                                                                     | (kgDM/year) | 34,488,198,625.02 | 23,074,303,460.37 | 12,772,826,708.50 | 9,003,257,436.32 |
| System meat production in carcass weight                                                                              | kg/year     | 792,165,541.81    | 526,494,592.62    | 264,069,383.88    | 204,906,475.20   |
| Bone-free-meat (BFM) to carcass weight ratio                                                                          | Fraction    | 0.7500            | 0.7500            | 0.7500            | 0.7500           |
| Meat protein content                                                                                                  | Fraction    | 0.2113            | 0.2113            | 0.2113            | 0.2113           |
| Milk protein content                                                                                                  | Fraction    |                   |                   | 0.0310            | 0.0310           |
| Bone-free-meat (0.75 x total carcass weight)                                                                          | kg/year     | 594,124,156.36    | 394,870,944.47    | 198,052,037.91    | 153,679,856.40   |
| Milk production (Adult Females)                                                                                       | kg/year     |                   |                   | 5,827,381,922.63  | 4,648,752,164.26 |
| Total meat protein (0.21 * Bone-free meat)                                                                            | kg/year     | 125538434.2       | 83436230.57       | 41848395.61       | 32472553.66      |
| Total milk protein (0.031 * Milk production)                                                                          | kg/year     | 0                 | 0                 | 180,648,839.60    | 144,111,317.09   |
| Total protein produce (Meat + milk protein)                                                                           | kg/year     | 125538434.2       | 83436230.57       | 222497235.2       | 176583870.7      |
| Meat protein contribution to total protein production<br>(Allocation factor for meat in dairy production orientation) | Fraction    |                   |                   | 0.1881            | 0.1839           |
| Milk protein (Allocation factor for milk in dairy production orientation)                                             | Fraction    |                   |                   | 0.8119            | 0.8161           |
| Meat contribution to the total production of meat (BFM)                                                               | Fraction    | 0.4431            | 0.2945            | 0.1477            | 0.1146           |
| Milk contribution to the total Milk production                                                                        | Fraction    |                   |                   | 0.5563            | 0.4437           |

Source: GLEAM-interactive tool for México (23)..

**Supplementary Table 8.** Parameters for chicken and pig production used in estimation of environmental footprint indicators by production system, based on GLEAM-i data for Mexico

| <b>Parameters for Chicken Production<br/>(GLEAM 2010)</b>                                                             | <b>Unit</b> | <b>Meat Broiler</b> | <b>Egg Backyard</b> | <b>Egg Layers</b> |
|-----------------------------------------------------------------------------------------------------------------------|-------------|---------------------|---------------------|-------------------|
| Total feed intake                                                                                                     | kgDM/year   | 9,316,053,949.10    | 1,013,767,270.07    | 7,079,026,038.41  |
| System meat production in carcass weight                                                                              | kg/year     | 3,133,227,104.65    | 9,038,455.54        | 198,063,643.67    |
| Bone-free-meat to carcass weight ratio                                                                                | Fraction    | 0.7500              | 0.7500              | 0.7500            |
| Meat protein content                                                                                                  | Fraction    | 0.1900              | 0.1900              | 0.1900            |
| Egg protein content                                                                                                   | Fraction    |                     | 0.1240              | 0.1240            |
| Bone-free-meat (0.75 x total carcass weight)                                                                          | kg/year     | 2,349,920,328.49    | 6,778,841.66        | 148,547,732.75    |
| Eggs production of a given system (kg)                                                                                | kg/year     |                     | 2,914,439,481.87    | 2,914,439,481.87  |
| Total meat protein (0.19 * Bone-free meat)                                                                            | kg/year     |                     | 1,287,979.91        | 28,224,069.22     |
| Total egg protein (0.12 * Egg production)                                                                             | kg/year     |                     | 361,390,495.75      | 361,390,495.75    |
| Total protein produce (Meat + Egg protein)                                                                            | kg/year     |                     | 362,678,475.67      | 389,614,564.97    |
| Meat protein contribution to total protein produced<br>(Allocation factor for meat for Egg production orientation)    | Fraction    |                     | 0.0036              | 0.0724            |
| Egg protein contribution to the total protein produced<br>(Allocation factor for Eggs for Egg production orientation) | Fraction    |                     | 0.9964              | 0.9276            |
| Meat contribution to the total production of meat (BFM)                                                               | Fraction    | 0.0524              | 0.0002              | 0.0033            |
| Egg contribution to the total production of eggs                                                                      | Fraction    |                     | 0.2782              | 0.2782            |

| <b>Parameters for Pig Production<br/>(GLEAM 2010)</b>   | <b>Unit</b> | <b>Backyard</b>  | <b>Intermediate</b> | <b>Industrial</b> |
|---------------------------------------------------------|-------------|------------------|---------------------|-------------------|
| Total feed intake                                       | kgDM/year   | 4,126,549,934.11 | 1,828,261,772.36    | 3,261,194,464.60  |
| System meat production in carcass weight                | kg/year     | 579,592,272.17   | 396,872,936.33      | 801,330,564.13    |
| Bone-free-meat to carcass weight ratio                  | Fraction    | 0.650            | 0.650               | 0.650             |
| Meat protein content                                    | Fraction    | 0.202            | 0.202               | 0.202             |
| Bone-free-meat (0.65 * total carcass weight)            | kg/year     | 376,734,976.91   | 257,967,408.61      | 520,864,866.68    |
| Total meat protein (0.20 * Bone-free meat)              | kg/year     | 76,100,465.34    | 52,109,416.54       | 105,214,703.07    |
| Meat contribution to the total production of meat (BFM) | Fraction    | 167,437,767.52   | 114,652,181.61      | 231,495,496.30    |

Source: *GLEAM-interactive tool for México* (23)

**Supplementary Table 9.** Average land use and average potential species loss per kg dry matter (DM) of each animal feed ration component

| N  | Feed ration components         | Name Primary Crops (FAO) | DM(%) of primary crops (Gleam) <sup>1</sup> | Average_LU/kgD M feed ration | Average Potential species loss per kg of DM product (Intense) | Average Potential species loss per kg of DM product (Light) |
|----|--------------------------------|--------------------------|---------------------------------------------|------------------------------|---------------------------------------------------------------|-------------------------------------------------------------|
| 1  | Beans from soy                 | Soybean                  | 0.91                                        | 3.60                         | 7.10E-10                                                      | 6.92E-10                                                    |
| 2  | By-product from oil production | Rapessed                 | 0.92                                        | 6.30                         | 7.21E-10                                                      | 7.02E-10                                                    |
| 3  | By-products from cottonseed    | Seed Cotton              | 0.94                                        | 3.06                         | 1.25E-09                                                      | 1.21E-09                                                    |
| 4  | By-products from soy (cake)    | Soybean                  | 0.91                                        | 3.60                         | 7.10E-10                                                      | 6.92E-10                                                    |
| 5  | Maiz yellow (bran)             | Yellow maiz              | 0.87                                        | 1.76                         | 5.32E-10                                                      | 5.18E-10                                                    |
| 6  | Wheat (bran)                   | Wheat                    | 0.87                                        | 2.17                         | 1.17E-09                                                      | 1.14E-09                                                    |
| 7  | Fresh grass                    | Rye grass en verde       | 0.90                                        | 0.29                         | 1.55E-10                                                      | 1.35E-10                                                    |
| 8  | Fruit from banana trees        | Banana                   | 0.20                                        | 1.74                         | 9.44E-10                                                      | 9.19E-10                                                    |
| 9  | Grains from barley (Hordeum    | Barley                   | 0.89                                        | 4.39                         | 6.09E-11                                                      | 5.95E-11                                                    |
| 10 | Grains from maize (Zea mays)   | Maize yellow             | 0.87                                        | 1.76                         | 5.32E-10                                                      | 5.18E-10                                                    |
| 11 | Grains from rice               | Rice                     | 0.89                                        | 1.60                         | 3.39E-10                                                      | 3.30E-10                                                    |
| 12 | Grains from sorghum            | Sorghum                  | 0.89                                        | 3.00                         | 1.07E-09                                                      | 1.04E-09                                                    |
| 13 | Grains from wheat (Triticum    | Wheat                    | 0.89                                        | 2.17                         | 1.17E-09                                                      | 1.14E-09                                                    |
| 15 | Leguminous beans               | Beans, dry               | 1.00                                        | 13.71                        | 7.44E-09                                                      | 7.23E-09                                                    |
| 16 | Maize White grain              | White maize              | 0.87                                        | 1.76                         | 1.96E-09                                                      | 1.91E-09                                                    |
| 17 | Fodder beet                    | Fodder beet **           | 0.25                                        | 2.31                         | 1.25E-09                                                      | 1.22E-09                                                    |
| 18 | Alfalfa green                  | Alfalfa green *          | 1.00                                        | 2.38                         | 8.94E-10                                                      | 7.82E-10                                                    |
| 19 | Sorghum forrage, green         | Sorghum forrage, green * | 1.00                                        | 2.22                         | 6.70E-10                                                      | 5.86E-10                                                    |
| 20 | Oat forrage                    | Oat forrage *            | 1.00                                        | 3.17                         | 1.19E-09                                                      | 1.04E-09                                                    |
| 21 | Silage from whole maize plant  | Forrage maize (green) *  | 1.00                                        | 1.49                         | 5.65E-10                                                      | 5.50E-10                                                    |
| 22 | Maize gluten meal              | Maize yellow             | 0.87                                        | 1.76                         | 5.32E-10                                                      | 5.18E-10                                                    |
| 23 | Molasses                       | Sugar can                | 0.32                                        | 0.44                         | 2.39E-10                                                      | 2.33E-10                                                    |
| 24 | Oil palm kernel expeller       | Oil palm fruit           | 0.53                                        | 1.27                         | 1.08E-09                                                      | 1.05E-09                                                    |

Source: Yield of crops taken from FAOSTAT as the average yield of 2008-2012 (24). \*Data on DM yield of alfalfa, sorghum, oat, and maize forage taken from Amendola et al. (25). DM factors taken from GLEAM (26) . \*\*The DM factor of fodder beet corresponds to that of sugar beet.

**Supplementary Table 10.** Land use, biodiversity loss, and parameters used to estimate the carbon footprint of animal-based food in SFFQ.

| Specie: Cattle (System-Orientation) | Unit                         | % Contribution system meat/milk | Meat/Milk emission intensity/kgProt | Contein of Prot/1kg product | Emission/kg Product | FCR   | Lan use m <sup>2</sup> /kg product | Biodiversity Loss/kg product (INTENSE) | Biodiversity Loss/kg product (light) |
|-------------------------------------|------------------------------|---------------------------------|-------------------------------------|-----------------------------|---------------------|-------|------------------------------------|----------------------------------------|--------------------------------------|
| LU Grass-Meat                       | kgCO <sub>2</sub> -eq/kgProt | 0.44                            | 338.48                              | 0.21                        | 71.08               | 58.05 | 63.00                              | 2.59E-08                               | 2.41E-08                             |
| LU Mix- Meat                        | kgCO <sub>2</sub> -eq/kgProt | 0.29                            | 321.07                              | 0.21                        | 67.42               | 58.44 | 66.06                              | 2.68E-08                               | 2.50E-08                             |
| LU Grass-Dairy-Meat                 | kgCO <sub>2</sub> -eq/kgProt | 0.15                            | 84.77                               | 0.21                        | 17.80               | 64.49 | 74.38                              | 2.98E-08                               | 2.78E-08                             |
| LU Mix-Dairy-Meat                   | kgCO <sub>2</sub> -eq/kgProt | 0.11                            | 88.54                               | 0.21                        | 18.59               | 58.58 | 72.41                              | 2.83E-08                               | 2.66E-08                             |
| LU Grass-Dairy-Milk                 | kgCO <sub>2</sub> -eq/kgProt | 0.56                            | 59.3                                | 0.031                       | 1.84                | 2.19  | 2.53                               | 1.01E-09                               | 9.45E-10                             |
| LU Mix-Dairy-Milk                   | kgCO <sub>2</sub> -eq/kgProt | 0.44                            | 50.46                               | 0.031                       | 1.56                | 1.94  | 0.00                               | 9.36E-10                               | 8.79E-10                             |
| Average emissions per meat beef     | kgCO <sub>2</sub> -eq/kgProt | 1.00                            | 267.23                              | 0.21                        | 56.12               |       | 66.66                              | 2.70E-08                               | 2.52E-08                             |
| Average emissions per milk beef     | kgCO <sub>2</sub> -eq/kgProt | 1.00                            | 55.38                               | 0.031                       | 1.72                |       | 1.41                               | 9.79E-10                               | 9.16E-10                             |

| Specie: Chicken (System-Orientation) | Unit                         | % Contribution system meat/egg | Meat/Egg emission intensity/kgProt | Contein of Prot/1kg product | Emission/kg Product | FCR  | Lan use m <sup>2</sup> /kg product | Biodiversity Loss/kg product (Intense) | Biodiversity Loss/kg product (Light) |
|--------------------------------------|------------------------------|--------------------------------|------------------------------------|-----------------------------|---------------------|------|------------------------------------|----------------------------------------|--------------------------------------|
| LU BROILER-Meat                      | kgCO <sub>2</sub> -eq/kgProt | 0.94                           | 7.88                               | 0.19                        | 1.50                | 3.96 | 8.80                               | 2.26E-09                               | 2.20E-09                             |
| LU BACKYARD- Meat                    | kgCO <sub>2</sub> -eq/kgProt | 0.00                           | 9.47                               | 0.19                        | 1.80                | 0.53 | 0.90                               | 2.89E-10                               | 2.81E-10                             |
| LU LAYER-Meat                        | kgCO <sub>2</sub> -eq/kgProt | 0.06                           | 14.84                              | 0.19                        | 2.82                | 3.45 | 10.58                              | 3.02E-09                               | 2.94E-09                             |
| LU BACKYARD-Egg                      | kgCO <sub>2</sub> -eq/kgProt | 0.50                           | 5.34                               | 0.124                       | 0.66                | 0.35 | 0.59                               | 1.89E-10                               | 1.83E-10                             |
| LU LAYER-Egg                         | kgCO <sub>2</sub> -eq/kgProt | 0.50                           | 7.16                               | 0.124                       | 0.89                | 2.25 | 6.91                               | 1.97E-09                               | 1.92E-09                             |
| Average emissions per chicken meat   | kgCO <sub>2</sub> -eq/kgProt | 1.00                           | 8.30                               | 0.19                        | 1.58                |      | 8.89                               | 2.30E-09                               | 2.24E-09                             |
| Average emissions per chicken egg    | kgCO <sub>2</sub> -eq/kgProt | 1.00                           | 6.25                               | 0.124                       | 0.78                |      | 3.75                               | 1.08E-09                               | 1.05E-09                             |

| Specie: Pig (System-Orientation) | Unit                         | % Contribution system meat/milk | Meat emission intensity/kgProt | Contein of Prot/1kg product | Emission/kg Product | FCR   | Lan use m <sup>2</sup> /kg product | Biodiversity Loss/kg product (Intense) | Biodiversity Loss/kg product (light) |
|----------------------------------|------------------------------|---------------------------------|--------------------------------|-----------------------------|---------------------|-------|------------------------------------|----------------------------------------|--------------------------------------|
| Backyard-Meat                    | kgCO <sub>2</sub> -eq/kgProt | 0.33                            | 36.76                          | 0.202                       | 7.43                | 10.95 | 22.71                              | 7.23E-09                               | 7.04E-09                             |
| Intermediate - Meat              | kgCO <sub>2</sub> -eq/kgProt | 0.22                            | 36.78                          | 0.202                       | 7.43                | 7.09  | 18.74                              | 5.19E-09                               | 5.06E-09                             |
| Industrial - Meat                | kgCO <sub>2</sub> -eq/kgProt | 0.45                            | 33.5                           | 0.202                       | 6.77                | 6.26  | 17.50                              | 4.59E-09                               | 4.47E-09                             |
| Average emissions per pig meat   | kgCO <sub>2</sub> -eq/kgProt | 1.00                            | 35.30                          | 0.202                       | 7.13                |       | 19.48                              | 5.59E-09                               | 5.44E-09                             |



Source: Calculation and parameters based on GLEAM-i emissions for Mexico.

**Supplementary Table 11.** Spearman correlation coefficients between diet quality (HEI-2015) and different environmental footprint indicators

|                                                            | HEI-2015 score             |         |
|------------------------------------------------------------|----------------------------|---------|
|                                                            | Spearman coefficient (rho) | p-value |
| Land use, m <sup>2</sup> /year/2000 kcal                   | -0.0198                    | 0.328   |
| Carbon footprint, kgCO <sub>2</sub> eq/2000 kcal           | -0.0945*                   | 0.000   |
| Blue water footprint, L/2000 kcal                          | 0.2968*                    | 0.000   |
| Potential species loss per/2000 kcal x 10 <sup>-10</sup> * | -0.1395*                   | 0.000   |

## References:

1. Vanham D, Leip A, Galli A, Kastner T, Bruckner M, Uwizeye A, van Dijk K, Ercin E, Dalin C, Brandão M, et al. Environmental footprint family to address local to planetary sustainability and deliver on the SDGs. *Sci Total Environ*. Elsevier; 2019;693:133642.
2. Rööß E. Analysing the Carbon Footprint of Food Insights for Consumer Communication. 2013;
3. Balcombe P, Speirs JF, Brandon NP, Hawkes AD. Methane emissions: choosing the right climate metric and time horizon. *Environ Sci Process Impacts*. Royal Society of Chemistry; 2018;20:1323–39.
4. Myhre G, Shindell Myhre G, Shindell D, Bréon F-M, Collins W, Fuglestvedt J, Huang J, Koch D, Lamarque J-F, Lee D, Mendoza B, Nakajima T, Robock A, Stephens G, Takemura T, Zhang H D, Bréon F-M, Collins W, Fuglestvedt J, Huang J, Koch D, Lamarque J-F, Lee D, ZH. Anthropogenic and natural radiative forcing. In: Stocker TF, Qin D, Plattner G-K, Tignor M, Allen SK, Boschung J, Nauels A, Xia Y, Bex V MP, editor. *Climate change 2013: the physical science basis Contribution of working group I to the fifth assessment report of the intergovernmental panel on climate change*. Cambridge: Cambridge Univ. Press; 2013.
5. Lynch J, Cain M, Frame D, Pierrehumbert R. Agriculture's Contribution to Climate Change and Role in Mitigation Is Distinct From Predominantly Fossil CO<sub>2</sub>-Emitting Sectors. *Front Sustain Food Syst*. Frontiers Media S.A.; 2021;4:300.
6. Rogelj J, Schleussner CF. Unintentional unfairness when applying new greenhouse gas emissions metrics at country level. *Environ Res Lett*. IOP Publishing; 2019;14:114039.
7. Steinfeld H, Gerber P, Wassenaar T, Castel V, Rosales M, Haan C. *Livestock's long shadow*. 2006.
8. Clune S, Crossin E, Verghese K. Systematic review of greenhouse gas emissions for different fresh food categories. *J Clean Prod*. 2017;140:766–83.
9. Forster, P.; Ramaswamy, V.; Artaxo, P.; Berntsen T. et al. Changes in Atmospheric Constituents and Radiative Forcing" *Climate Change 2013: The Physical Science Basis. Contribution of Working Group I to the Fourth Assessment Report of the Intergovernmental Panel on Climate Change*. 2017 p. 129–234.
10. Hoekstra AY, Chapagain AK, Mekonnen MM, Aldaya MM. *The water footprint assessment manual: Setting the global standard*. Routledge; 2011.
11. Pfister S, Boulay AM, Berger M, Hadjikakou M, Motoshita M, Hess T, Ridoutt B, Weinzettel J, Scherer L, Döll P, et al. Understanding the LCA and ISO water footprint: A response to Hoekstra (2016) "A critique on the water-scarcity weighted water footprint in LCA." *Ecol Indic*. Elsevier; 2017;72:352–9.
12. Kounina A, Margni M, Bayart JB, Boulay AM, Berger M, Bulle C, Frischknecht R, Koehler A, Milà I Canals L, Motoshita M, et al. Review of methods addressing freshwater use in life cycle inventory and impact assessment. *Int J Life Cycle Assess*. Springer Verlag; 2013;18:707–21.
13. Quinteiro P, Ridoutt BG, Arroja L, Dias AC. Identification of methodological challenges remaining in the assessment of a water scarcity footprint: a review. *Int J Life Cycle Assess* 2017 231. Springer; 2017;23:164–80.
14. Boulay AM, Bare J, Benini L, Berger M, Lathuillière MJ, Manzardo A, Margni M, Motoshita M, Núñez M, Pastor AV, et al. The WULCA consensus characterization model for water scarcity footprints: assessing impacts of water consumption based on available water remaining (AWARE). *Int J Life Cycle Assess*. Springer Verlag; 2018;23:368–78.
15. Ran Y, van Middelaar CE, Lannerstad M, Herrero M, de Boer IJM. Freshwater use in livestock production—To be used for food crops or livestock feed? *Agric Syst*. Elsevier; 2017;155:1–8.
16. Ridoutt BG, Hendrie GA, Noakes M. *Dietary Strategies to Reduce Environmental Impact: A Critical Review of the Evidence Base*. Adv Nutr. Oxford University Press; 2017;8:933.
17. Curran M, De Souza DM, Antón A, Teixeira RFM, Michelsen O, Vidal-Legaz B, Sala S, Milà I Canals L. How Well Does LCA Model Land Use Impacts on Biodiversity? - A Comparison with



- Approaches from Ecology and Conservation. *Environ Sci Technol*. American Chemical Society; 2016;50:2782–95.
18. Chaudhary A, Brooks TM. Land use intensity-specific global characterization factors to assess biodiversity footprints. *Environ Sci Technol*. 2018;52:5094–104.
  19. Mekonnen MM, Hoekstra AY. Hydrology and Earth System Sciences The green, blue and grey water footprint of crops and derived crop products. *Hydrol Earth Syst Sci*. 2011;15:1577–600.
  20. Poore J, Nemecek T. Reducing food’s environmental impacts through producers and consumers. *Science* (80- ). American Association for the Advancement of Science; 2018;360:987–92.
  21. El comercio mundial del café-Conversiones y estadísticas.
  22. Ortiz-Rodríguez OO, Villamizar-Gallardo RA, Naranjo-Merino CA, García-Caceres RG, Castañeda-Galvís MT. on-line) Recebido pelo Conselho Editorial em: 15-10-2015 Aprovado pelo Conselho Editorial em: 2-2-2016 *Eng. J Brazilian Assoc Agric Eng*. 36:260–70.
  23. FAO. Glean-i [Internet]. Available from: <https://gleami.apps.fao.org/>
  24. FAO. FAOSTAT [Internet]. Crops. 2019. Available from: <https://www.fao.org/faostat/en/>
  25. (PDF) Recursos forrajeros en México y sus perspectivas para la intensificación.
  26. FAO. Global livestock environmental assessment model. Version 2. Rome, Italy;
